# Supplementary material for: Mono- and dinuclear oxidovanadium(v) complexes of an amine-bis(phenolate) ligand with bromo-peroxidase activities: synthesis, characterization, catalytic, kinetic and computational studies
Source: Royal Society of Chemistry journal article supplement (doi:10.1039/c7dt04718e), 2018-01-01
Supplement: c7dt04718e1.pdf [file c7dt04718e1.pdf]

*Electronic Supplementary File for Dalton Transaction-2017*

**Mono- and dinuclear oxidovanadium(V) complexes of an amine-bis(phenolate) ligand with bromo-peroxidase activities: synthesis, characterization, catalytic, kinetic and computational studies**

Mainak Debnath<sup>a</sup>, Malay Dolai<sup>a</sup>, Kaberi Pal<sup>a</sup>, Sourav Bhunya<sup>b</sup>, Akan Paul<sup>b</sup>, Hon Man Lee<sup>b</sup> and  
Mahammad Ali<sup>a,\*</sup>

E-mail: [m\\_ali2062@yahoo.com](mailto:m_ali2062@yahoo.com)

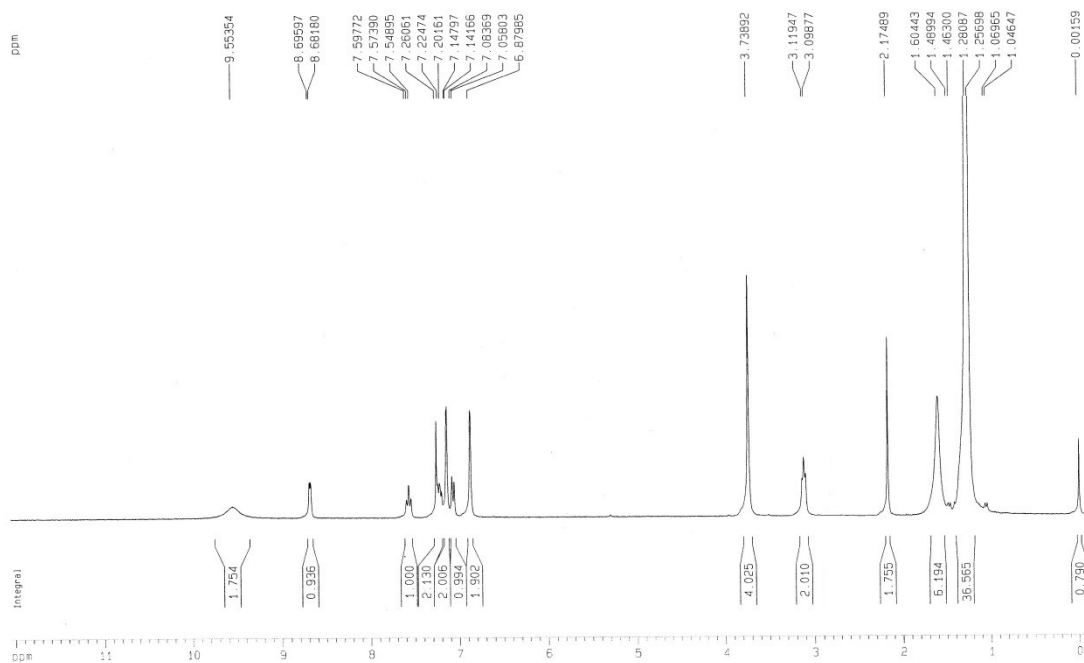

**Figure S1.** <sup>1</sup>H-NMR spectra of ligand.

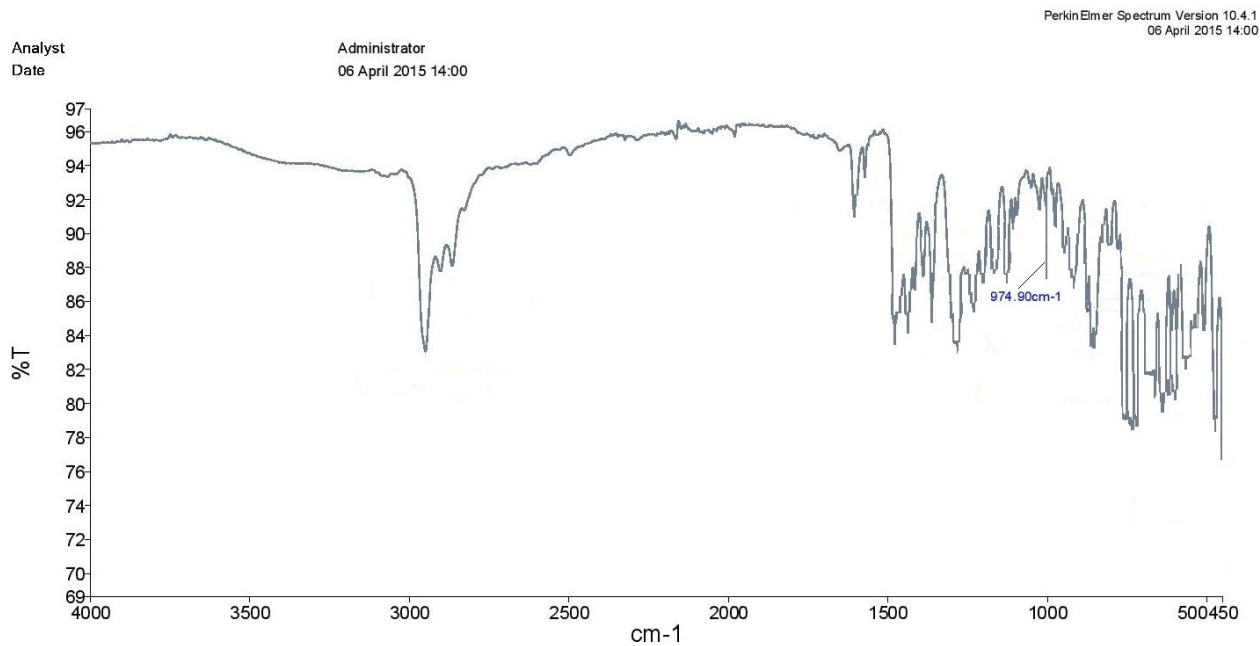

**Figure S2.** FT-IR spectra of complex -1.

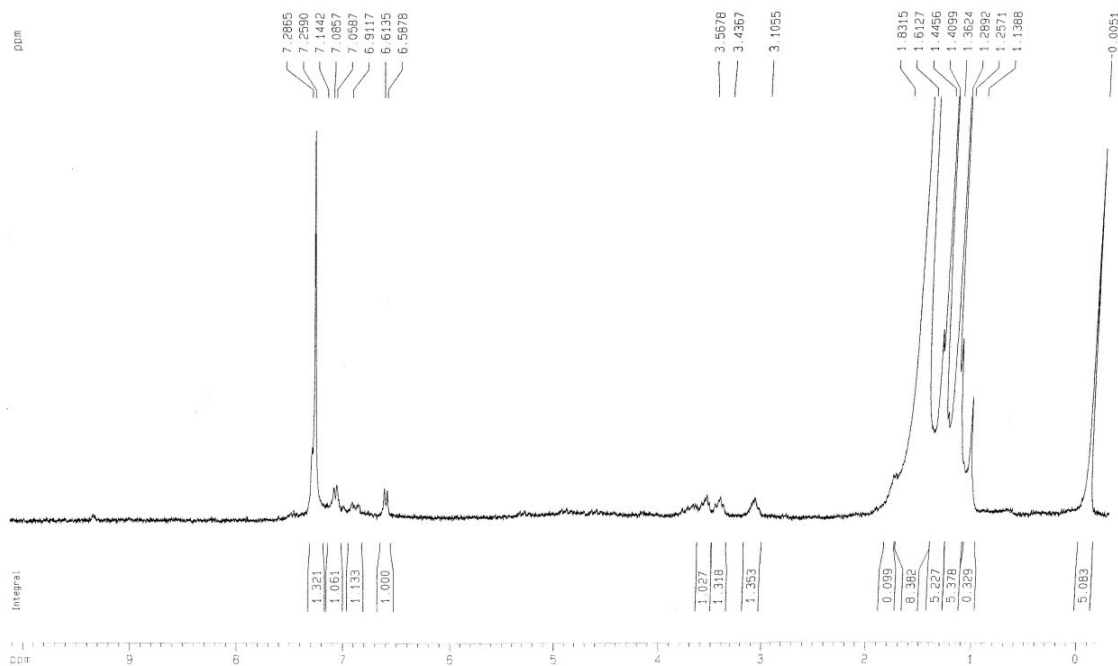

**Figure S3.** <sup>1</sup>H-NMR spectra of complex-1.

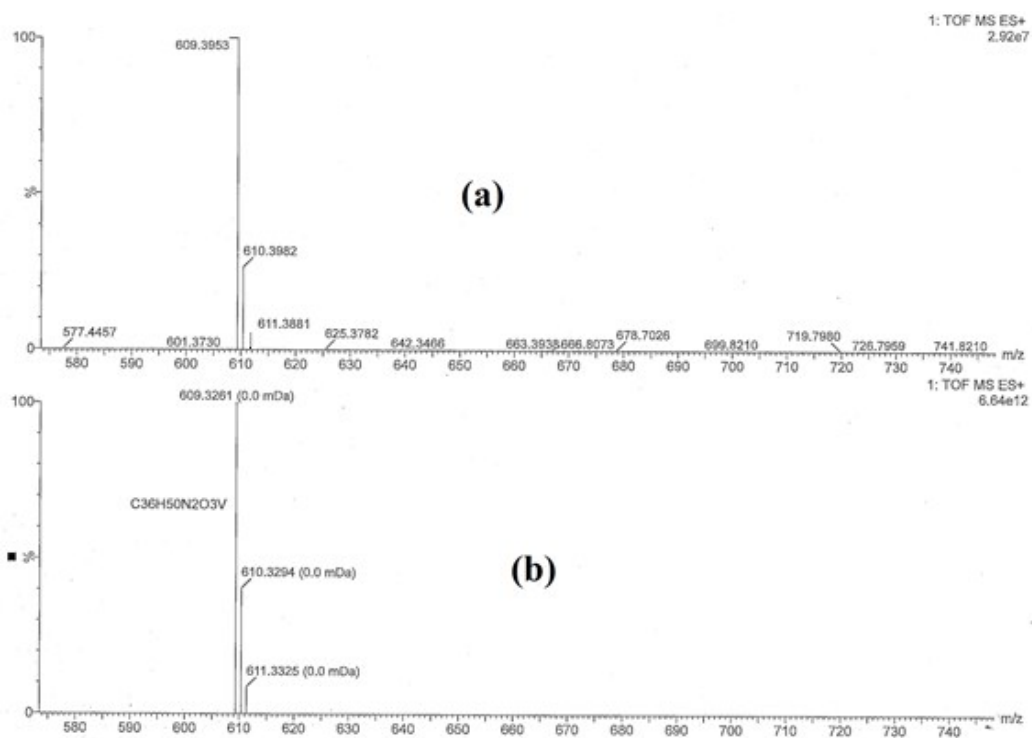

**Figure S4.** (a) Obtained HRMS of the complex 1( $[L^1VO]^+$ ); (b) simulated HRMS spectra.

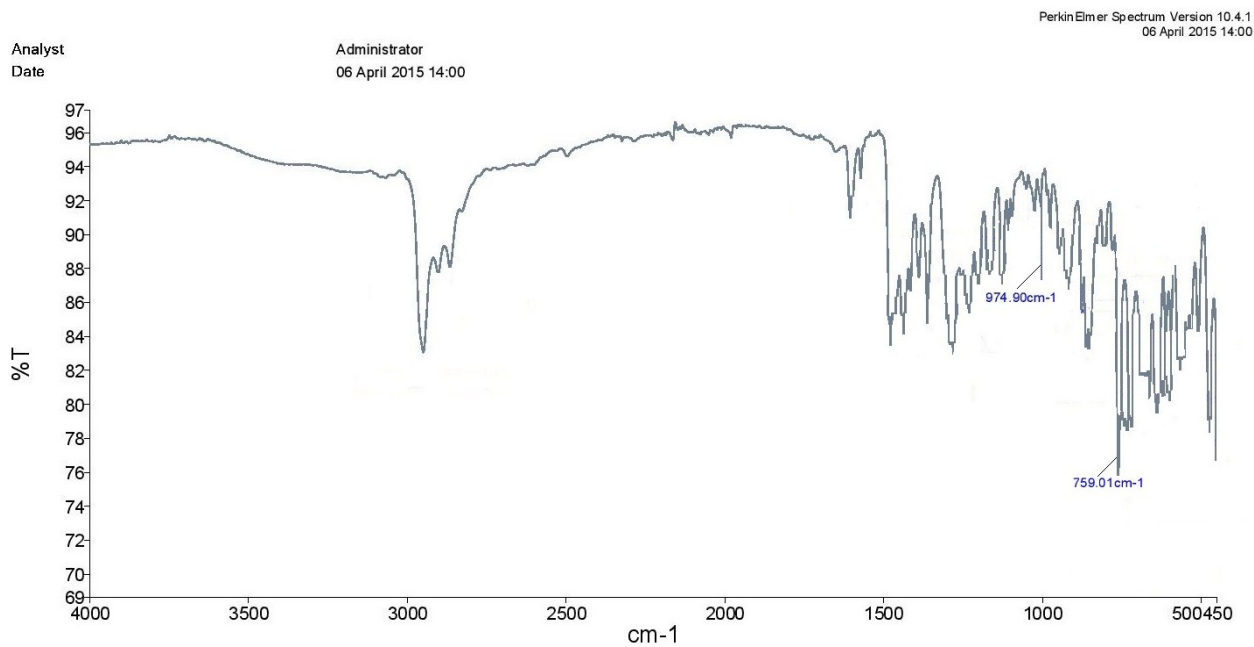

**Figure S5.** FT-IR spectra of complex -2.

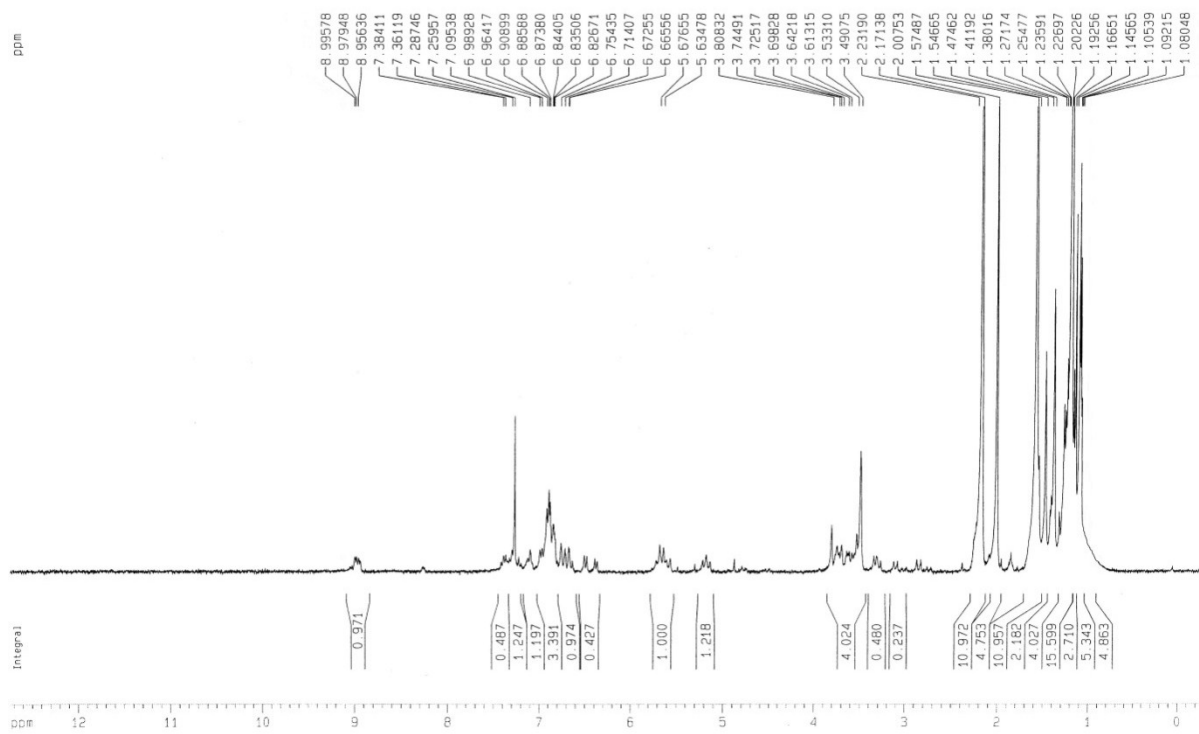

**Figure S6.** <sup>1</sup>H-NMR spectra of complex-2.

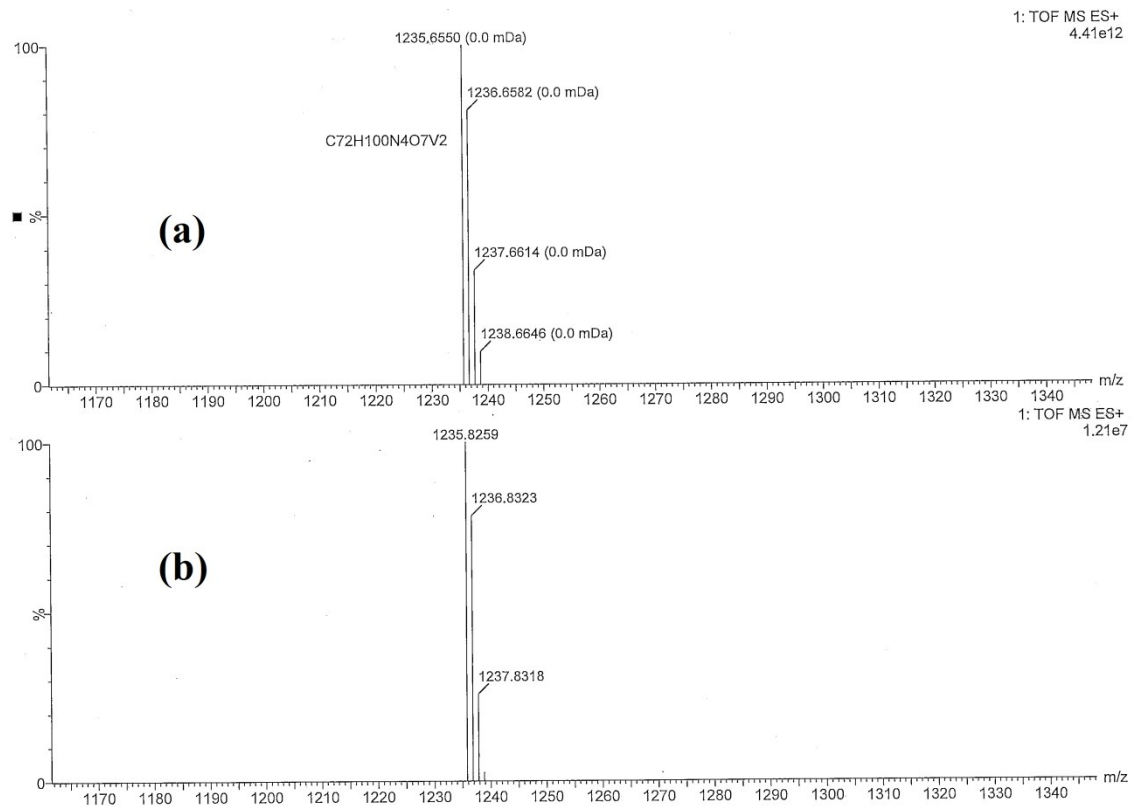

**Figure S7. (a)** Simulated HRMS of the complex **2** ( $[L^1VO(\mu_2-O)VOL^1]$ ); **(b)** Obtained HRMS.

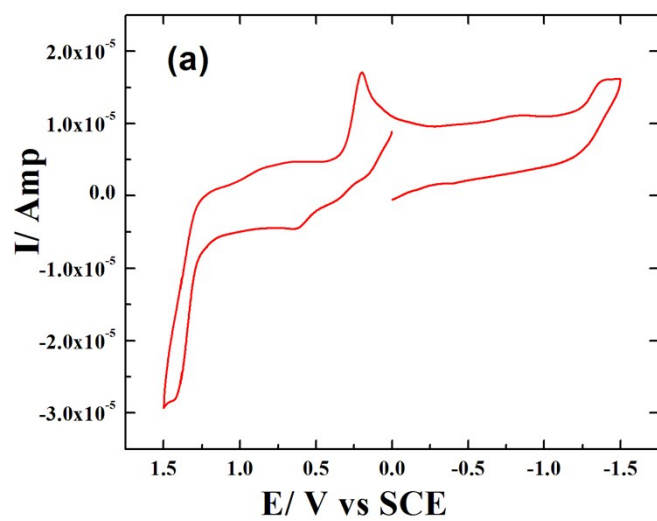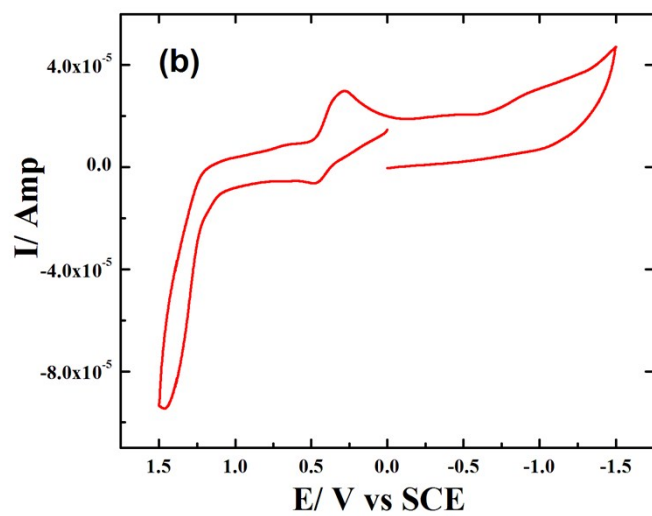

Figure S8. CV of (a) complex 1 and (b) complex 2 in presence of  $1.0 \times 10^{-3}$  M perchloric acid.

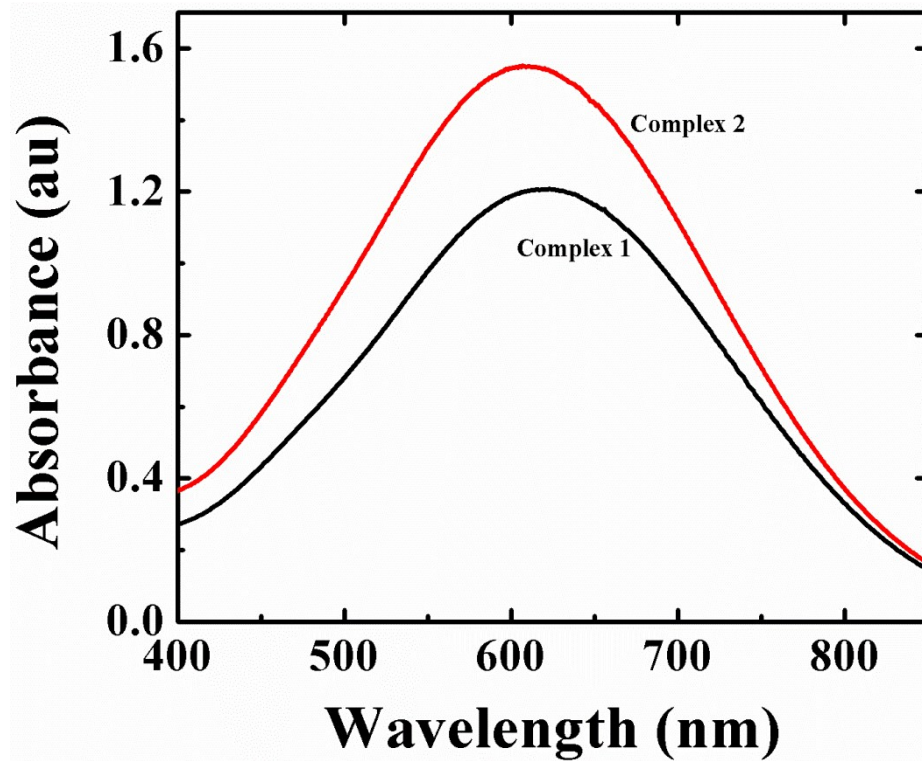

**Figure S9.** Electronic spectra of complexes 1 and 2 in MeCN at  $[C] = 0.50$  mM at 25 °C.

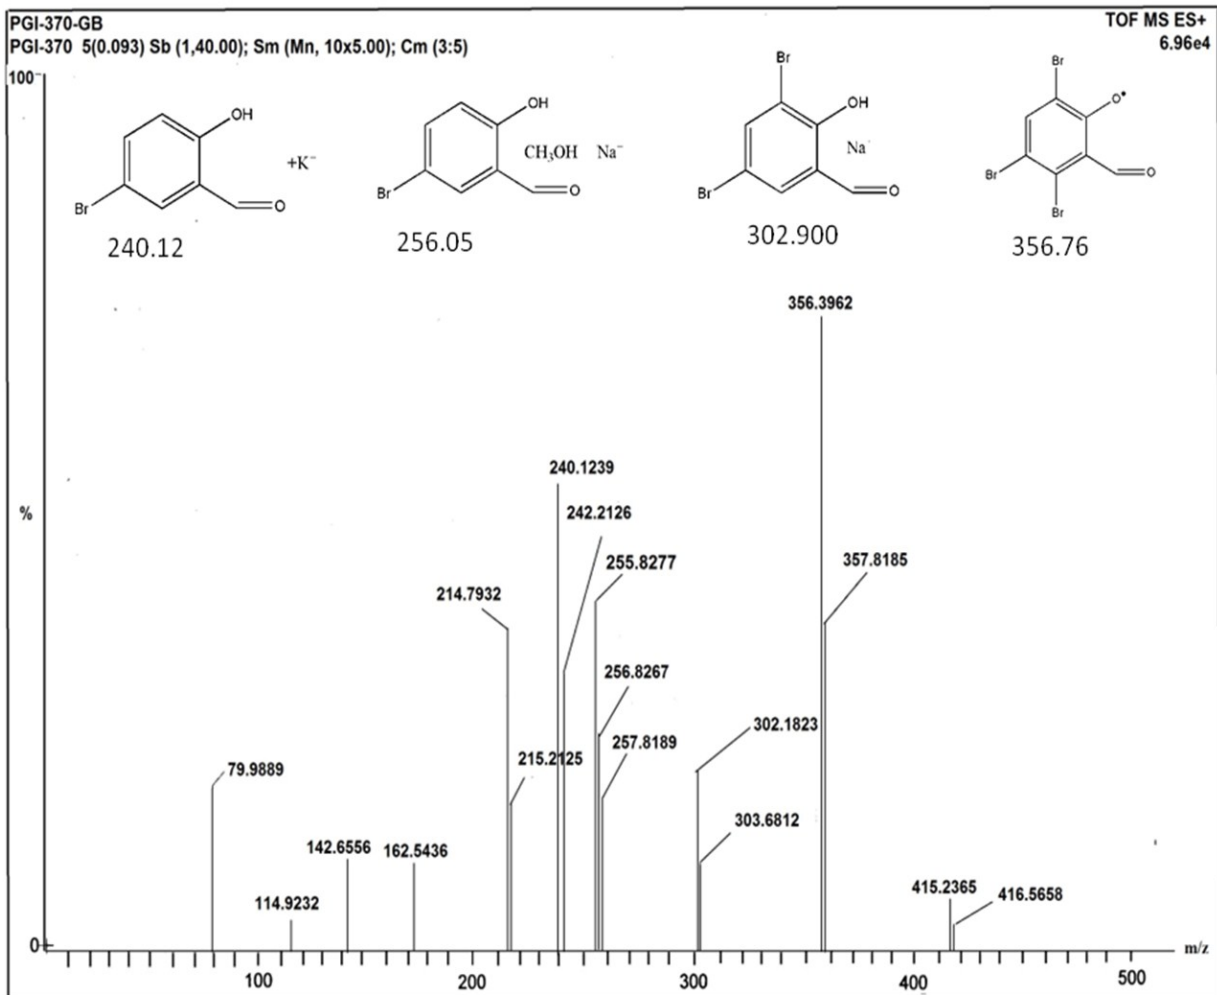

Figure S10. Products of bromoperoxidation of salicylaldehyde.



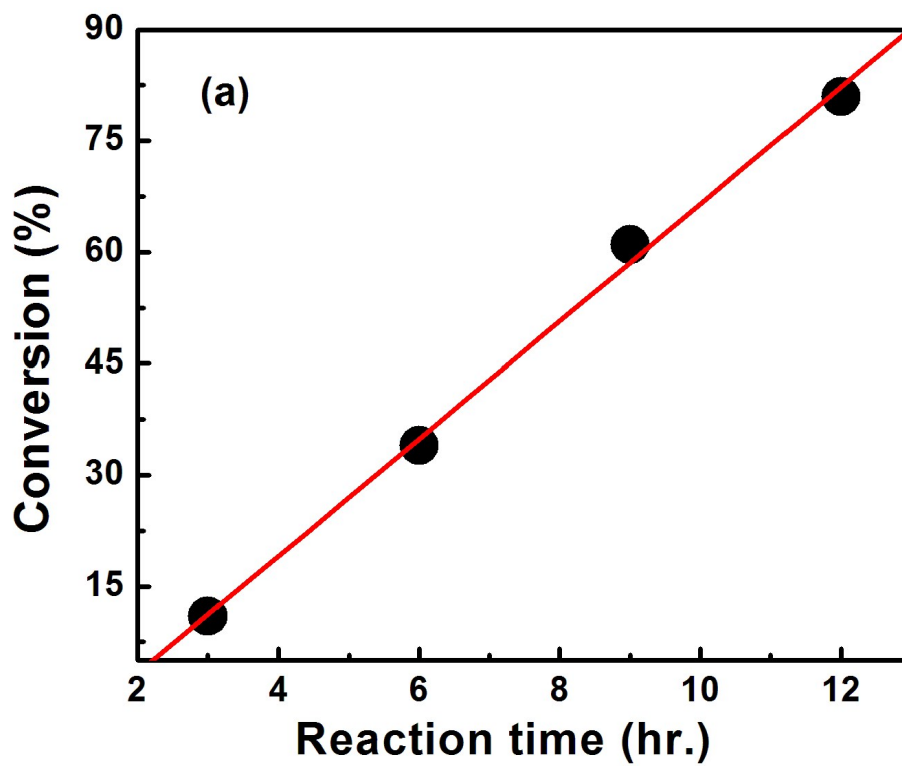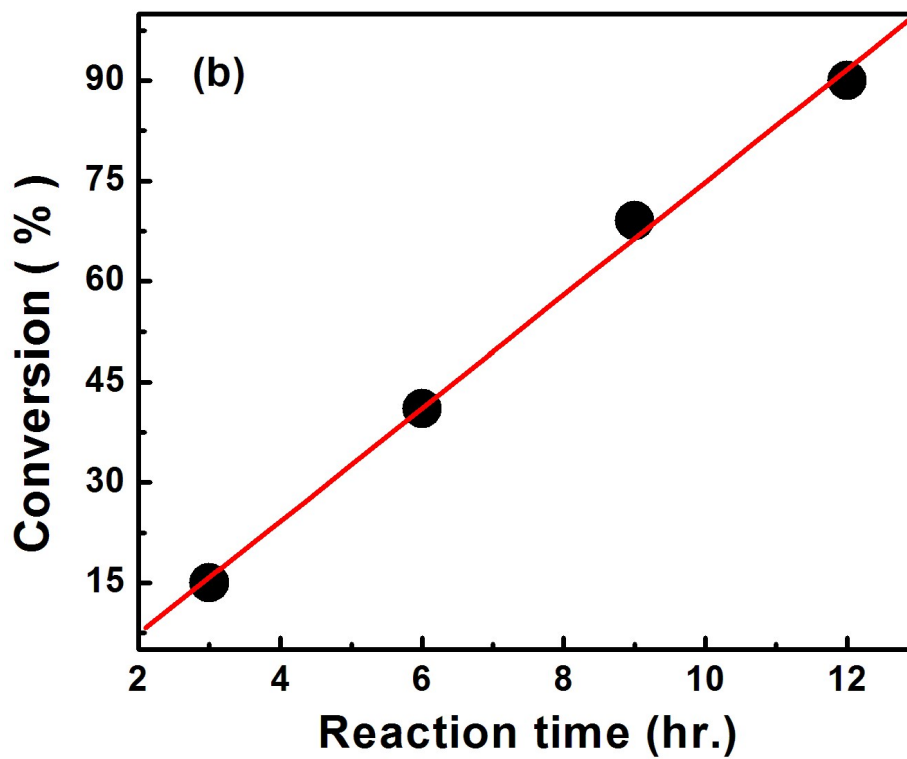

Figure S11. Plot of % conversion as a function of time for (a) complex 1 and (b) complex 2.

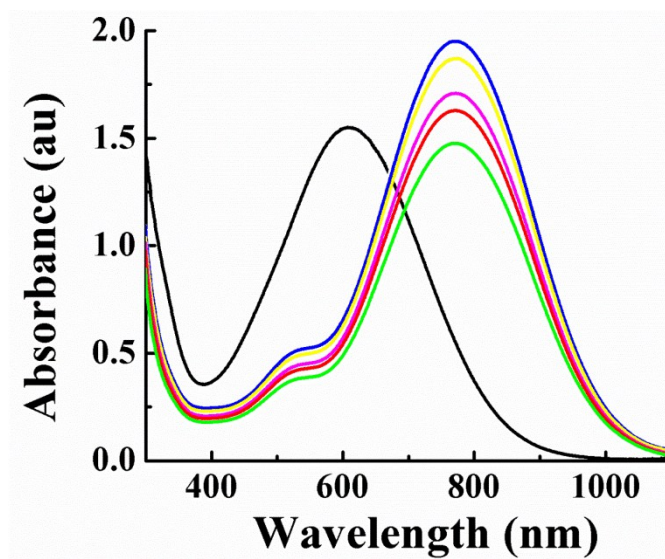

**Figure S12.** Shift in  $\lambda_{\text{max}}$  of complex 2 (0.50 mM at 25 °C) with addition of HClO<sub>4</sub> (blue line with 1 equiv acid, yellow with 2 equiv acid, magenta with 4 equiv acid, red with 6 equiv acid and green with 10 equiv acid).

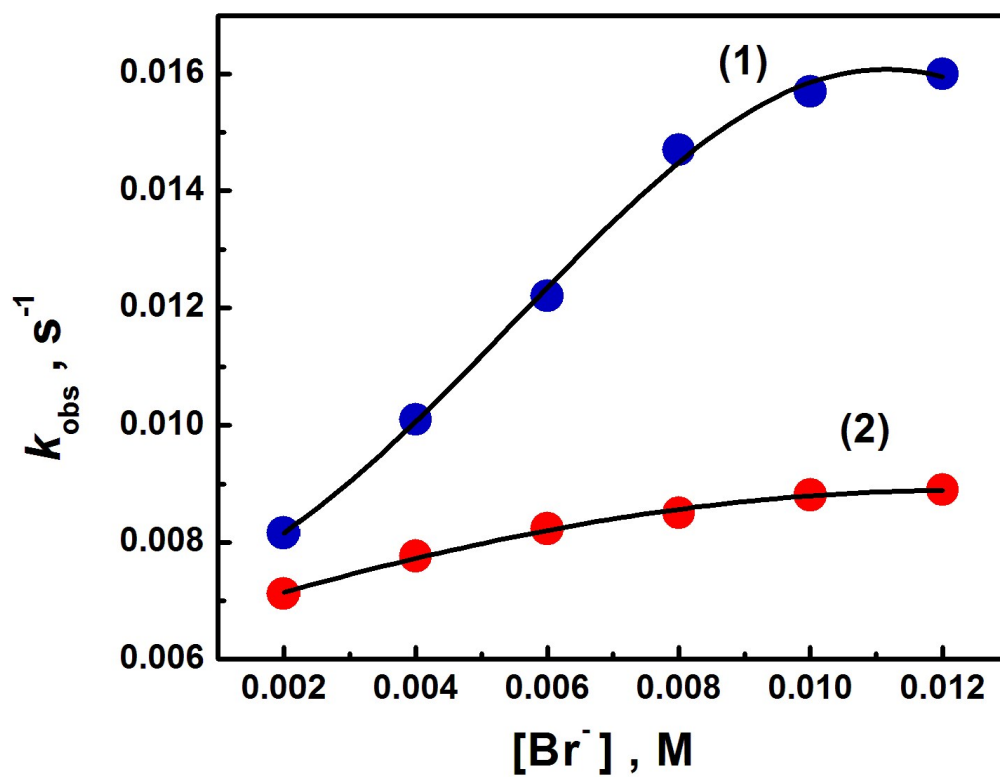

**Figure S13.** Variation of rate ( $k_{\text{obs}}$ ) with  $[\text{Br}^-]$  in MeCN at  $[\text{C}] = 1 \times 10^{-4}$  M,  $[\text{Substrate}] = 2.5 \times 10^{-3}$  M,  $[\text{H}^+] = 0.025$  M and  $[\text{H}_2\text{O}_2] = 1.25 \times 10^{-3}$  M.

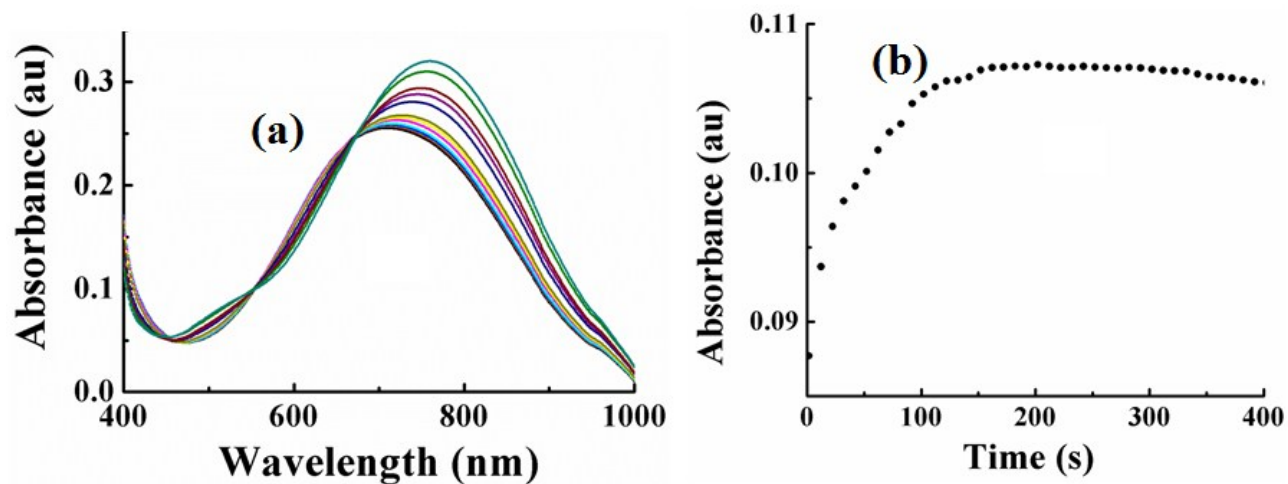

Figure S14. (a) Time resolved spectra for the protonation of **2** showing two clean isosbestic points at 550 and 670 nm; (b) time-dependent kinetic trace for the protonation of [L<sup>1</sup>(O)VOV(O)L<sup>1</sup>].

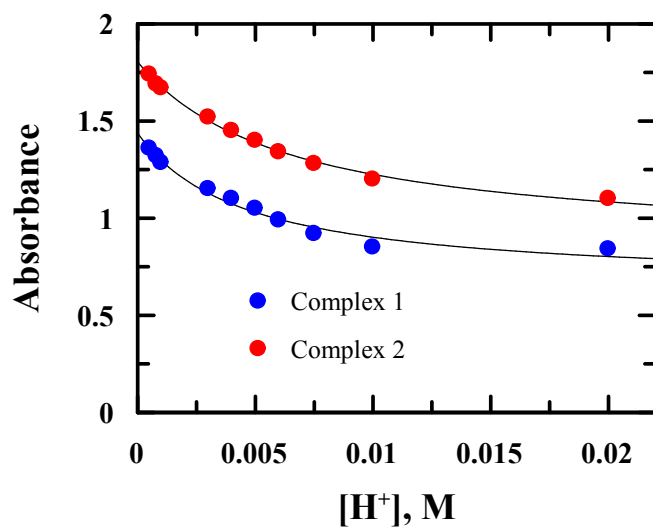

Figure S15. Plots of absorbance (at 685 nm for **1** and 600 nm for **2**) vs. [H<sup>+</sup>].

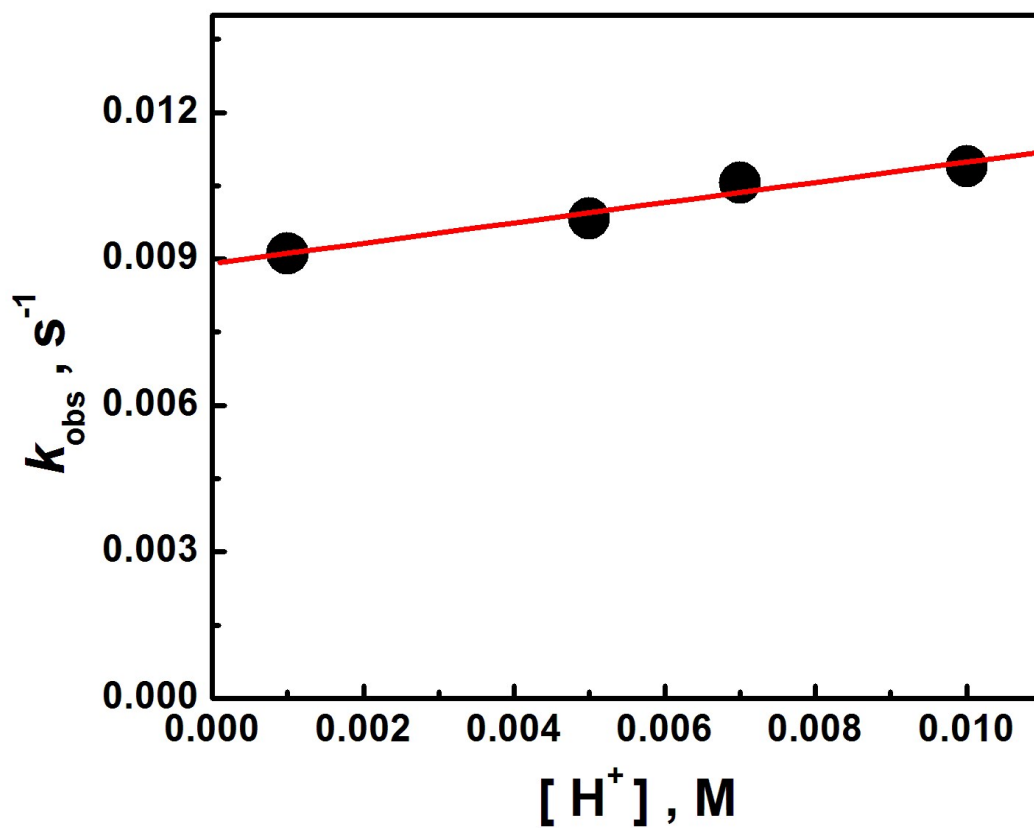

**Figure S16.** Variation of rate ( $k_{\text{obs}}$ ) with buffer concentration at pH 2.93 in MeCN at  $[C] = 1 \times 10^{-4}$  M,  $[\text{Substrate}] = 2.5 \times 10^{-3}$  M,  $[\text{Br}^-] = 1.25 \times 10^{-3}$  M and  $[\text{H}_2\text{O}_2] = 1.25 \times 10^{-3}$  M for complex 1.

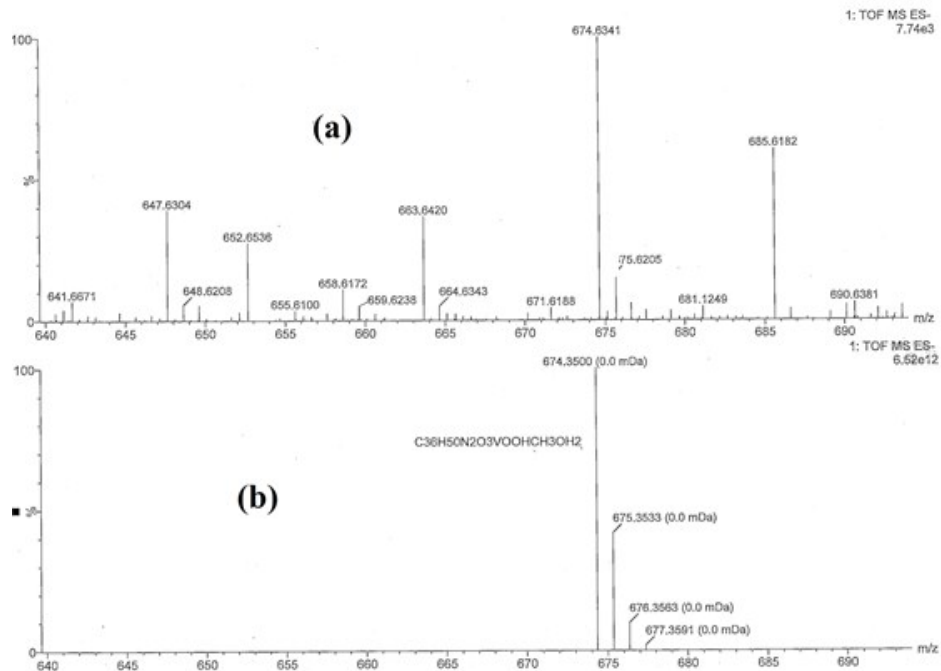

**Figure S17.** (a) Obtained HRMS of the intermediate  $([L^1V(OH)(OOH)(MeO)(H)]^-)$ , proposed in the catalytic cycle; (b) simulated HRMS

## I. Coordinates of important optimized Intermediates and transition states:

*I*

|   |             |             |             |
|---|-------------|-------------|-------------|
| V | -0.03687900 | -1.46252200 | -0.79782300 |
| O | -1.83941200 | -1.20519900 | -0.59402900 |
| O | 1.78501700  | -1.18317400 | -0.83048600 |
| O | -0.00382600 | -3.00009700 | -0.42226400 |
| N | -0.07432000 | 0.99472900  | -0.71246300 |
| N | 0.16085300  | -0.88537700 | 1.31521300  |
| C | 0.33436700  | -1.85474400 | 2.23640700  |
| H | 0.27370800  | -2.86886500 | 1.85991900  |
| C | 0.58124000  | -1.58148900 | 3.57474500  |
| H | 0.70994200  | -2.39840700 | 4.27664600  |
| C | 0.66749500  | -0.24807400 | 3.97859500  |
| H | 0.87151200  | 0.00730700  | 5.01451300  |
| C | 0.48696400  | 0.74999000  | 3.02885100  |
| H | 0.54246500  | 1.79944100  | 3.30263500  |
| C | 0.22292900  | 0.40043900  | 1.69971100  |
| C | -0.08022800 | 1.47747300  | 0.68035200  |
| H | 0.62470600  | 2.30823300  | 0.81364200  |
| H | -1.07806400 | 1.86721800  | 0.91316400  |
| C | -5.05875000 | 0.28218300  | 0.17569500  |
| H | -6.03172800 | -0.00428400 | 0.55496100  |
| C | -4.08778900 | -0.71182800 | 0.03831100  |
| C | -2.81333100 | -0.30514400 | -0.45963300 |
| C | -4.38825400 | -2.18571700 | 0.37983600  |
| C | -4.20962100 | -3.06171200 | -0.88579300 |
| H | -4.90239700 | -2.74581100 | -1.67491200 |
| H | -3.19253900 | -3.00443800 | -1.27766000 |
| H | -4.42773900 | -4.10999900 | -0.64608400 |
| C | -3.44235100 | -2.68527400 | 1.49920100  |
| H | -2.40065200 | -2.67073200 | 1.17696200  |
| H | -3.54194500 | -2.06667400 | 2.40007900  |
| H | -3.70043900 | -3.71680000 | 1.76948100  |
| C | -5.83470800 | -2.38150500 | 0.87910600  |
| H | -6.03526600 | -1.82399800 | 1.80196100  |
| H | -6.57541900 | -2.08400500 | 0.12791300  |
| H | -5.99703300 | -3.44313400 | 1.09558600  |
| C | 1.12079700  | 1.47544200  | -1.45950200 |
| C | 2.44131100  | 1.09390400  | -0.84853700 |
| C | 2.73252000  | -0.26852500 | -0.63008600 |
| C | 4.04034600  | -0.66502600 | -0.21808000 |
| C | 4.95958300  | 0.35780700  | 0.02501700  |
| H | 5.95476100  | 0.08122900  | 0.34995900  |
| C | 4.68207800  | 1.72852200  | -0.13346600 |
| C | 5.77294800  | 2.77048600  | 0.17116700  |
| C | 7.00018700  | 2.52105000  | -0.73849200 |
| H | 6.72762600  | 2.60953800  | -1.79632400 |
| C | 5.28750700  | 4.21296300  | -0.06951800 |

|    |             |             |             |
|----|-------------|-------------|-------------|
| H  | 6.09313600  | 4.91786900  | 0.16528700  |
| H  | 5.00010700  | 4.37770100  | -1.11425100 |
| H  | 4.43114800  | 4.46707100  | 0.56610200  |
| C  | 6.20258200  | 2.65033600  | 1.65321300  |
| H  | 6.59115100  | 1.65331100  | 1.88540400  |
| H  | 6.99049200  | 3.37808100  | 1.88387800  |
| H  | 5.35593200  | 2.84283900  | 2.32270200  |
| C  | 4.43696900  | -2.15104200 | -0.10294700 |
| C  | 3.54858400  | -2.88427400 | 0.93006500  |
| H  | 2.50588200  | -2.90885900 | 0.61195000  |
| H  | 3.89265000  | -3.91988000 | 1.04420800  |
| H  | 3.60899600  | -2.40011000 | 1.91287700  |
| C  | 5.90346400  | -2.32665800 | 0.34314700  |
| H  | 6.08894400  | -1.90096500 | 1.33683000  |
| H  | 6.13563400  | -3.39603300 | 0.39643800  |
| H  | 6.60906300  | -1.87457100 | -0.36334000 |
| C  | 4.28304500  | -2.82855800 | -1.48820600 |
| H  | 4.56543500  | -3.88647400 | -1.41934000 |
| H  | 3.25443000  | -2.77239400 | -1.85044300 |
| H  | 4.93781600  | -2.35223700 | -2.22763500 |
| C  | 3.40617300  | 2.06940400  | -0.58682700 |
| H  | 3.14284400  | 3.10743000  | -0.76510100 |
| C  | -2.59036700 | 1.03935100  | -0.82524100 |
| C  | -4.85650600 | 1.63602000  | -0.14904300 |
| C  | -3.60242500 | 1.98730200  | -0.65247900 |
| C  | -1.28552700 | 1.44556700  | -1.45738400 |
| H  | -1.26318200 | 2.54229000  | -1.56682100 |
| H  | -1.20030200 | 1.01053800  | -2.45796000 |
| H  | 1.07027800  | 2.57235400  | -1.55845300 |
| H  | 1.03918100  | 1.04588900  | -2.46344800 |
| H  | -3.39145500 | 3.01302700  | -0.93829500 |
| C  | -5.99686900 | 2.65018700  | 0.04931000  |
| C  | -6.41458300 | 2.67488500  | 1.53942700  |
| C  | -5.58643900 | 4.07913900  | -0.35522100 |
| C  | -7.21258500 | 2.23737600  | -0.81540800 |
| H  | -6.75473800 | 1.69270000  | 1.88366300  |
| H  | -5.57634400 | 2.98037500  | 2.17656600  |
| H  | -7.23602400 | 3.38530700  | 1.69449600  |
| H  | -5.31348300 | 4.14154000  | -1.41485600 |
| H  | -6.42522400 | 4.76485700  | -0.19020700 |
| H  | -4.74057000 | 4.44440800  | 0.23896000  |
| H  | -8.03522400 | 2.95130000  | -0.68388800 |
| H  | -6.94672800 | 2.21592400  | -1.87835200 |
| H  | -7.58724100 | 1.24467500  | -0.54503800 |
| H  | 7.42529100  | 1.52354600  | -0.58646300 |
| H  | 7.78767300  | 3.25498200  | -0.52686600 |
| C1 | -0.18078600 | -1.42785700 | -3.10375800 |

*1a*<sup>+</sup>

|   |             |             |             |
|---|-------------|-------------|-------------|
| V | -0.04793600 | -1.29290600 | -0.55466000 |
| O | -1.81539000 | -1.06680200 | -0.42858400 |
| O | 1.74009000  | -1.03923100 | -0.62213000 |
| O | -0.01903300 | -2.95721500 | -0.14559900 |
| N | -0.10003800 | 1.05441900  | -0.71047500 |
| N | 0.10204900  | -0.62804400 | 1.47076200  |
| C | 0.23817000  | -1.53021700 | 2.46801500  |
| H | 0.19977100  | -2.57031200 | 2.16952900  |
| C | 0.41760000  | -1.15292300 | 3.79043300  |
| H | 0.51829800  | -1.91333100 | 4.55700600  |
| C | 0.47019500  | 0.20810500  | 4.09818500  |
| H | 0.61814200  | 0.54041800  | 5.12117600  |
| C | 0.32708100  | 1.13365600  | 3.07074800  |
| H | 0.35633000  | 2.20020100  | 3.27152200  |
| C | 0.13442400  | 0.68523400  | 1.76103500  |
| C | -0.10900100 | 1.67152700  | 0.64408400  |
| H | 0.63444500  | 2.47433400  | 0.70056700  |
| H | -1.08834600 | 2.13186200  | 0.81486300  |
| C | -5.10327800 | 0.35054600  | 0.14557600  |
| H | -6.08046200 | 0.07048900  | 0.51570600  |
| C | -4.11057000 | -0.62906000 | 0.11321500  |
| C | -2.83758200 | -0.21065000 | -0.37711900 |
| C | -4.38485800 | -2.08026100 | 0.55315700  |
| C | -4.12244000 | -3.04225000 | -0.63373700 |
| H | -4.77316800 | -2.80076600 | -1.48181700 |
| H | -3.08510300 | -3.00112700 | -0.97394700 |
| H | -4.34029000 | -4.07184600 | -0.32657100 |
| C | -3.47911000 | -2.46104100 | 1.74980200  |
| H | -2.42171700 | -2.44315100 | 1.47986000  |
| H | -3.63834600 | -1.78116800 | 2.59536800  |
| H | -3.72178100 | -3.47563100 | 2.08631000  |
| C | -5.84836700 | -2.27835400 | 0.99845400  |
| H | -6.10515100 | -1.66272300 | 1.86806300  |
| H | -6.55823700 | -2.05817600 | 0.19360400  |
| H | -5.99526000 | -3.32465700 | 1.28514100  |
| C | 1.09181200  | 1.51224200  | -1.49694900 |
| C | 2.41702400  | 1.20099200  | -0.86141100 |
| C | 2.71681500  | -0.13261500 | -0.50758800 |
| C | 4.02335800  | -0.49700700 | -0.06147400 |
| C | 4.93841900  | 0.54930600  | 0.06701300  |
| H | 5.93436300  | 0.31018900  | 0.41500800  |
| C | 4.66126600  | 1.89752500  | -0.23294400 |
| C | 5.75426400  | 2.96224200  | -0.05046900 |
| C | 6.96458300  | 2.61457200  | -0.95232700 |
| H | 6.67541900  | 2.59229000  | -2.00893400 |
| C | 5.26359100  | 4.37404400  | -0.42514200 |
| H | 6.07213100  | 5.09557400  | -0.26919300 |
| H | 4.96635100  | 4.44024200  | -1.47804700 |
| H | 4.41722500  | 4.69279600  | 0.19483800  |
| C | 6.20571600  | 2.98351200  | 1.43076500  |



|    |             |             |             |
|----|-------------|-------------|-------------|
| H  | 6.60884600  | 2.01759300  | 1.75208900  |
| H  | 6.99164900  | 3.73387000  | 1.57252700  |
| H  | 5.37121600  | 3.23839700  | 2.09438200  |
| C  | 4.43131500  | -1.95738900 | 0.21531200  |
| C  | 3.53815400  | -2.58497300 | 1.31158200  |
| H  | 2.49675200  | -2.65798100 | 0.99435000  |
| H  | 3.89090500  | -3.59759200 | 1.53888100  |
| H  | 3.58199400  | -1.99937800 | 2.23766800  |
| C  | 5.89324700  | -2.06946400 | 0.69599400  |
| H  | 6.06261100  | -1.53588500 | 1.63836200  |
| H  | 6.12972300  | -3.12415900 | 0.86985300  |
| H  | 6.60518800  | -1.69648600 | -0.04826000 |
| C  | 4.30672600  | -2.77244000 | -1.09614500 |
| H  | 4.61278700  | -3.81025000 | -0.92106800 |
| H  | 3.28186200  | -2.78592700 | -1.47207500 |
| H  | 4.95529700  | -2.35641700 | -1.87533300 |
| C  | 3.38014900  | 2.19590900  | -0.71023700 |
| H  | 3.12166400  | 3.21056000  | -0.99403900 |
| C  | -2.62585900 | 1.10539700  | -0.84303300 |
| C  | -4.92231900 | 1.68259500  | -0.27677400 |
| C  | -3.66094000 | 2.03478300  | -0.77354900 |
| C  | -1.31625700 | 1.47030600  | -1.48688100 |
| H  | -1.28065600 | 2.55744700  | -1.64552000 |
| H  | -1.22884900 | 0.99059400  | -2.46658900 |
| H  | 1.01119900  | 2.59634200  | -1.65986500 |
| H  | 1.01687500  | 1.02266700  | -2.47302000 |
| H  | -3.47563700 | 3.04032900  | -1.13549800 |
| C  | -6.09177000 | 2.67580700  | -0.19353000 |
| C  | -6.55967500 | 2.79507700  | 1.27806900  |
| C  | -5.70356900 | 4.08127800  | -0.69132700 |
| C  | -7.26340500 | 2.15923900  | -1.06545500 |
| H  | -6.89483800 | 1.83493400  | 1.68362100  |
| H  | -5.75410000 | 3.16999700  | 1.91992200  |
| H  | -7.40019200 | 3.49476800  | 1.34710000  |
| H  | -5.40109300 | 4.07595800  | -1.74484600 |
| H  | -6.56492000 | 4.75139400  | -0.60367900 |
| H  | -4.89017500 | 4.51647100  | -0.09874500 |
| H  | -8.10443500 | 2.85999500  | -1.01441400 |
| H  | -6.96273600 | 2.06617600  | -2.11496700 |
| H  | -7.62649400 | 1.18200800  | -0.73091400 |
| H  | 7.39812200  | 1.64110900  | -0.70132200 |
| H  | 7.75064600  | 3.36858400  | -0.83157300 |
| Cl | -0.13571200 | -1.50200400 | -2.86287000 |
| H  | 0.57738400  | -3.60721800 | -0.67662400 |
| O  | 1.21520700  | -4.43461900 | -1.84771300 |
| H  | 0.68433500  | -5.22312000 | -2.05134500 |
| H  | 1.06952300  | -3.82257300 | -2.59503700 |

*Ts1*

|   |             |             |             |
|---|-------------|-------------|-------------|
| V | 0.06822400  | 1.17424400  | -0.28307500 |
| O | 1.81707900  | 0.91297800  | -0.29221800 |
| O | -1.67821400 | 0.90011200  | -0.53281200 |
| O | 0.04841500  | 2.59503000  | 0.75293900  |
| N | 0.14633800  | -1.24471200 | -0.57651400 |
| N | -0.22079700 | 0.22205500  | 1.74216300  |
| C | -0.48830700 | 0.98553900  | 2.82040000  |
| H | -0.38793700 | 2.05165300  | 2.66546700  |
| C | -0.86292100 | 0.45733200  | 4.04868700  |
| H | -1.05733000 | 1.12458200  | 4.88128500  |
| C | -0.98845400 | -0.92601400 | 4.17479500  |
| H | -1.29586800 | -1.37599800 | 5.11395300  |
| C | -0.70083900 | -1.71903500 | 3.07006300  |
| H | -0.76611800 | -2.80119800 | 3.12393700  |
| C | -0.30294900 | -1.11520600 | 1.87441300  |
| C | 0.18337700  | -1.94741500 | 0.72832400  |
| H | -0.37481300 | -2.89025300 | 0.67422000  |
| H | 1.22562200  | -2.20854500 | 0.94519300  |
| C | 5.15419700  | -0.42402700 | 0.18670200  |
| H | 6.12999900  | -0.12595500 | 0.54493800  |
| C | 4.13484700  | 0.52762800  | 0.19731200  |
| C | 2.86565900  | 0.08409000  | -0.28703200 |
| C | 4.38417500  | 1.96943600  | 0.67950500  |
| C | 4.14937000  | 2.95488200  | -0.49299400 |
| H | 4.81819800  | 2.72880100  | -1.33123100 |
| H | 3.12051100  | 2.93289100  | -0.85618600 |
| H | 4.36620300  | 3.97673200  | -0.15952200 |
| C | 3.44530800  | 2.31609600  | 1.86193600  |
| H | 2.39457700  | 2.32390600  | 1.56743500  |
| H | 3.57743900  | 1.60696900  | 2.68843800  |
| H | 3.69291800  | 3.31518200  | 2.23937500  |
| C | 5.83404000  | 2.16632400  | 1.16983800  |
| H | 6.07713600  | 1.52023400  | 2.02125200  |
| H | 6.56815900  | 1.98957400  | 0.37610700  |
| H | 5.95813300  | 3.20255900  | 1.50018200  |
| C | -1.04708200 | -1.69197000 | -1.36714400 |
| C | -2.38923500 | -1.33088800 | -0.79323900 |
| C | -2.68367000 | 0.01556700  | -0.49318600 |
| C | -4.00726000 | 0.43097300  | -0.16550800 |
| C | -4.96441200 | -0.58077100 | -0.08725600 |
| H | -5.97879000 | -0.30461900 | 0.16765700  |
| C | -4.69990000 | -1.94421800 | -0.32583900 |
| C | -5.83395400 | -2.97436400 | -0.20541700 |
| C | -6.95405000 | -2.62479700 | -1.21656100 |
| H | -6.57692800 | -2.64350600 | -2.24504300 |
| C | -5.35350900 | -4.40939400 | -0.49531800 |
| H | -6.19178400 | -5.10494500 | -0.38538700 |
| H | -4.97278200 | -4.51681600 | -1.51734100 |
| H | -4.57032600 | -4.72866800 | 0.20238500  |
| C | -6.40854800 | -2.93755600 | 1.23237500  |

|    |             |             |             |
|----|-------------|-------------|-------------|
| H  | -6.80987900 | -1.95227300 | 1.49156700  |
| H  | -7.22489300 | -3.66233300 | 1.32793100  |
| H  | -5.64062100 | -3.19413000 | 1.97142800  |
| C  | -4.37286000 | 1.91000600  | 0.07438000  |
| C  | -3.63671100 | 2.44409800  | 1.32663500  |
| H  | -2.55183200 | 2.41348000  | 1.21107600  |
| H  | -3.93277100 | 3.48332100  | 1.51839400  |
| H  | -3.90190400 | 1.85703200  | 2.21312400  |
| C  | -5.88513700 | 2.10120100  | 0.31388000  |
| H  | -6.22985800 | 1.58592300  | 1.21705600  |
| H  | -6.09616000 | 3.16748200  | 0.44888100  |
| H  | -6.48420700 | 1.75400600  | -0.53471600 |
| C  | -3.99543300 | 2.75343500  | -1.17069200 |
| H  | -4.26063500 | 3.80577000  | -0.99480600 |
| H  | -2.93216800 | 2.68004500  | -1.41448200 |
| H  | -4.55613700 | 2.42559600  | -2.05267200 |
| C  | -3.39347800 | -2.29107300 | -0.68893700 |
| H  | -3.14535300 | -3.32025800 | -0.92454800 |
| C  | 2.67326000  | -1.23339800 | -0.76182300 |
| C  | 4.99995000  | -1.75116600 | -0.25963900 |
| C  | 3.73443700  | -2.13289200 | -0.72499300 |
| C  | 1.36057100  | -1.64757800 | -1.36767800 |
| H  | 1.34753700  | -2.74108100 | -1.48376500 |
| H  | 1.25190400  | -1.19918800 | -2.35632300 |
| H  | -0.98763700 | -2.78293700 | -1.48964600 |
| H  | -0.94613900 | -1.23458000 | -2.35439100 |
| H  | 3.56588400  | -3.14110200 | -1.08692800 |
| C  | 6.19771800  | -2.71159100 | -0.22613300 |
| C  | 6.70473300  | -2.84738700 | 1.23139400  |
| C  | 5.83807800  | -4.11699600 | -0.74523900 |
| C  | 7.33188200  | -2.14164300 | -1.11471800 |
| H  | 7.02454800  | -1.88707800 | 1.64860300  |
| H  | 5.92559900  | -3.25690500 | 1.88461700  |
| H  | 7.56470700  | -3.52565000 | 1.26492200  |
| H  | 5.50467900  | -4.09719400 | -1.78912600 |
| H  | 6.72196000  | -4.76131500 | -0.69798800 |
| H  | 5.05642000  | -4.59093200 | -0.13986500 |
| H  | 8.19334800  | -2.81870500 | -1.09771300 |
| H  | 7.00359400  | -2.03624300 | -2.15465400 |
| H  | 7.67419200  | -1.16124200 | -0.76804700 |
| H  | -7.38084700 | -1.63334200 | -1.03259600 |
| H  | -7.76773700 | -3.35478200 | -1.13999800 |
| Cl | 0.22380000  | 0.68271200  | -3.34371100 |
| H  | -0.51812400 | 3.36537600  | 0.48688200  |
| O  | -1.29133100 | 4.84639400  | -0.14898500 |
| H  | -2.08876000 | 4.61498000  | -0.65494000 |
| H  | -1.52396900 | 5.60856300  | 0.40521700  |
| O  | -0.12423000 | 2.81121300  | -1.69172000 |
| H  | 0.08135300  | 2.33732400  | -2.57545300 |
| O  | 0.85760300  | 3.86626000  | -1.60647800 |
| H  | 0.28322000  | 4.56544100  | -1.22344900 |

|   |             |             |             |
|---|-------------|-------------|-------------|
| V | 0.06846700  | -1.33062500 | -0.55464900 |
| O | -1.72772100 | -1.07866700 | -0.61309900 |
| O | 1.84250100  | -1.12946500 | -0.44080800 |
| O | -0.01448000 | -2.99759000 | 0.01872200  |
| N | 0.14007100  | 1.00324600  | -0.75970400 |
| N | -0.07266100 | -0.55340600 | 1.50180000  |
| C | -0.22513100 | -1.40317300 | 2.53899700  |
| H | -0.19728500 | -2.45660500 | 2.28745000  |
| C | -0.40841300 | -0.95959600 | 3.84152300  |
| H | -0.52158600 | -1.67853300 | 4.64562800  |
| C | -0.44741900 | 0.41568800  | 4.08075200  |
| H | -0.59768000 | 0.79983700  | 5.08523700  |
| C | -0.28813400 | 1.28898400  | 3.01013400  |
| H | -0.30741200 | 2.36443700  | 3.15830100  |
| C | -0.09244800 | 0.77045100  | 1.72680900  |
| C | 0.17319900  | 1.69152800  | 0.55824600  |
| H | 1.16655900  | 2.13112100  | 0.69953000  |
| H | -0.54620100 | 2.51790800  | 0.57385300  |
| C | -4.88541900 | 0.58064800  | 0.11054800  |
| H | -5.87752900 | 0.36507700  | 0.48466900  |
| C | -3.99035500 | -0.48286400 | -0.02178700 |
| C | -2.68926400 | -0.15196400 | -0.49982700 |
| C | -4.41419900 | -1.93431600 | 0.28046700  |
| C | -4.33044500 | -2.75826300 | -1.02944600 |
| H | -5.04009300 | -2.38119500 | -1.77413700 |
| H | -3.32925900 | -2.70782800 | -1.46495900 |
| H | -4.58252300 | -3.80776400 | -0.82805100 |
| C | -3.50596400 | -2.56792000 | 1.36082600  |
| H | -2.47164900 | -2.66068000 | 1.02535200  |
| H | -3.51901400 | -1.97033300 | 2.27964400  |
| H | -3.87368700 | -3.57033600 | 1.61162900  |
| C | -5.86692700 | -2.02409700 | 0.79151000  |
| H | -6.00442900 | -1.48535900 | 1.73570800  |
| H | -6.58908200 | -1.63882800 | 0.06370500  |
| H | -6.11829200 | -3.07422100 | 0.97452600  |
| C | 1.35038700  | 1.34987600  | -1.57875100 |
| C | 2.66265800  | 1.01986500  | -0.92234000 |
| C | 2.86973100  | -0.27392600 | -0.40107900 |
| C | 4.13307100  | -0.66842200 | 0.12612700  |
| C | 5.12661000  | 0.31232400  | 0.12555600  |
| H | 6.09882900  | 0.04932700  | 0.52050300  |
| C | 4.95192900  | 1.62338000  | -0.35894300 |
| C | 6.12150900  | 2.61966900  | -0.30773100 |
| C | 7.30315300  | 2.06543300  | -1.14157000 |
| H | 7.01559000  | 1.92799600  | -2.18996600 |
| C | 5.73889300  | 4.00050800  | -0.87416700 |
| H | 6.59996000  | 4.67389100  | -0.81115500 |
| H | 5.44497200  | 3.94532500  | -1.92869900 |
| H | 4.92064600  | 4.46334300  | -0.30990900 |
| C | 6.57263600  | 2.80755900  | 1.16170400  |

|   |             |             |             |
|---|-------------|-------------|-------------|
| H | 6.90590200  | 1.86789700  | 1.61421800  |
| H | 7.41006600  | 3.51286300  | 1.20920500  |
| H | 5.75823700  | 3.20765400  | 1.77670500  |
| C | 4.39900600  | -2.09633500 | 0.64158800  |
| C | 3.47009700  | -2.41617300 | 1.83810200  |
| H | 2.41769500  | -2.40198000 | 1.54929700  |
| H | 3.69888000  | -3.41625500 | 2.22451600  |
| H | 3.62107200  | -1.69927500 | 2.65406800  |
| C | 5.85389600  | -2.27304000 | 1.12254200  |
| H | 6.09654900  | -1.61195200 | 1.96227800  |
| H | 5.99308800  | -3.30277200 | 1.46756900  |
| H | 6.57891300  | -2.09698900 | 0.32018100  |
| C | 4.15679400  | -3.11693400 | -0.49950200 |
| H | 4.37400300  | -4.12946100 | -0.13952500 |
| H | 3.12319000  | -3.09693500 | -0.85248400 |
| H | 4.81772600  | -2.91450000 | -1.35010100 |
| C | 3.69622200  | 1.95355700  | -0.88293000 |
| H | 3.51247600  | 2.94312500  | -1.28737600 |
| C | -2.37561000 | 1.16591100  | -0.88645000 |
| C | -4.58977600 | 1.91849300  | -0.21664900 |
| C | -3.31672200 | 2.18292300  | -0.73114600 |
| C | -1.05792000 | 1.42638800  | -1.55732100 |
| H | -0.96771600 | 2.49799000  | -1.78528500 |
| H | -1.00636500 | 0.87817300  | -2.50358100 |
| H | 1.32263000  | 2.42234000  | -1.81765000 |
| H | 1.24492100  | 0.79667800  | -2.51732200 |
| H | -3.04538300 | 3.18711800  | -1.03945100 |
| C | -5.65708000 | 3.00806900  | -0.02216600 |
| C | -6.07362400 | 3.05753500  | 1.46839300  |
| C | -5.14575900 | 4.40460500  | -0.42560200 |
| C | -6.89532500 | 2.67642800  | -0.89089300 |
| H | -6.49419000 | 2.10586100  | 1.80976400  |
| H | -5.21743200 | 3.29674400  | 2.10981500  |
| H | -6.83632300 | 3.82968100  | 1.62056100  |
| H | -4.87169300 | 4.45169000  | -1.48581400 |
| H | -5.93470400 | 5.14554400  | -0.25992000 |
| H | -4.27805000 | 4.71190900  | 0.17015600  |
| H | -7.66423900 | 3.44630800  | -0.75951000 |
| H | -6.63192900 | 2.63803100  | -1.95382300 |
| H | -7.34088000 | 1.71381600  | -0.61948000 |
| H | 7.65973000  | 1.10249500  | -0.76144500 |
| H | 8.14515100  | 2.76629900  | -1.11002500 |
| H | -0.55712100 | -3.59077700 | -0.55644200 |
| O | -1.29988100 | -4.22666500 | -2.12988700 |
| H | -0.71105200 | -4.83039500 | -2.61372400 |
| H | -2.16598900 | -4.66516000 | -2.09140900 |
| O | 0.21611700  | -1.44565100 | -2.35571100 |
| O | -0.93841100 | -1.60792300 | -3.17555100 |
| H | -1.24274700 | -2.50595700 | -2.90305500 |

|   |             |             |             |
|---|-------------|-------------|-------------|
| V | 0.07052200  | -1.31485100 | -0.60663800 |
| O | -1.75471300 | -1.09379000 | -0.68519900 |
| O | 1.83842900  | -1.10897900 | -0.43066000 |
| O | -0.05335300 | -2.91739500 | 0.21080100  |
| N | 0.13970500  | 1.02173600  | -0.79037700 |
| N | -0.15701300 | -0.55132200 | 1.43781700  |
| C | -0.35963700 | -1.39834000 | 2.46901900  |
| H | -0.31412000 | -2.44947100 | 2.21744500  |
| C | -0.61585000 | -0.95529600 | 3.75973200  |
| H | -0.76510900 | -1.67889000 | 4.55371500  |
| C | -0.68374100 | 0.41732200  | 4.00010500  |
| H | -0.89508400 | 0.79960300  | 4.99422000  |
| C | -0.47075100 | 1.28969800  | 2.93889600  |
| H | -0.50503600 | 2.36533900  | 3.08166000  |
| C | -0.19638500 | 0.77283300  | 1.67035900  |
| C | 0.16105600  | 1.69205400  | 0.53541600  |
| H | 1.17548600  | 2.06283800  | 0.71793800  |
| H | -0.50316400 | 2.56381200  | 0.53401700  |
| C | -4.90380500 | 0.58222600  | 0.03861900  |
| H | -5.90066500 | 0.36328800  | 0.39849800  |
| C | -4.01159700 | -0.48115200 | -0.10837200 |
| C | -2.70236700 | -0.15434000 | -0.57137600 |
| C | -4.44688200 | -1.93798400 | 0.14932700  |
| C | -4.37771000 | -2.71449300 | -1.19076300 |
| H | -5.11553400 | -2.33515400 | -1.90624200 |
| H | -3.39250700 | -2.60843900 | -1.65580700 |
| H | -4.59669200 | -3.77811200 | -1.02329800 |
| C | -3.53991400 | -2.61777200 | 1.20221800  |
| H | -2.50545400 | -2.70364000 | 0.86480200  |
| H | -3.54944700 | -2.05290000 | 2.14153100  |
| H | -3.91680300 | -3.62500500 | 1.41915500  |
| C | -5.89863300 | -2.03503500 | 0.66182100  |
| H | -6.02751900 | -1.52589900 | 1.62341000  |
| H | -6.62137200 | -1.62125700 | -0.04950800 |
| H | -6.15720100 | -3.08867700 | 0.81227000  |
| C | 1.36128600  | 1.40899600  | -1.57780800 |
| C | 2.66553800  | 1.04794900  | -0.91652200 |
| C | 2.86050300  | -0.24735900 | -0.39306500 |
| C | 4.11551200  | -0.64392800 | 0.15399400  |
| C | 5.11530700  | 0.32991700  | 0.16423900  |
| H | 6.08114300  | 0.06178500  | 0.57119400  |
| C | 4.95232500  | 1.64123300  | -0.32237800 |
| C | 6.12548500  | 2.63247100  | -0.25725600 |
| C | 7.31306800  | 2.07376900  | -1.07963000 |
| H | 7.03559400  | 1.93887700  | -2.13108800 |
| C | 5.75523600  | 4.01584300  | -0.82577800 |
| H | 6.61852300  | 4.68533800  | -0.75223400 |
| H | 5.47274200  | 3.96355300  | -1.88359000 |
| H | 4.93289400  | 4.48147200  | -0.26982100 |
| C | 6.56238600  | 2.81649000  | 1.21689900  |

|   |             |             |             |
|---|-------------|-------------|-------------|
| H | 6.88609600  | 1.87470600  | 1.67186900  |
| H | 7.40293900  | 3.51738500  | 1.27382900  |
| H | 5.74372700  | 3.22009300  | 1.82389000  |
| C | 4.36858000  | -2.07582700 | 0.66534000  |
| C | 3.39434000  | -2.42205900 | 1.81818600  |
| H | 2.35611900  | -2.44217200 | 1.48239400  |
| H | 3.63760100  | -3.41397100 | 2.21684400  |
| H | 3.48720300  | -1.70102400 | 2.63935600  |
| C | 5.80399000  | -2.24948400 | 1.20297300  |
| H | 6.00890600  | -1.59258600 | 2.05606300  |
| H | 5.93391600  | -3.28096300 | 1.54639800  |
| H | 6.56107100  | -2.06565100 | 0.43259800  |
| C | 4.18086500  | -3.07967500 | -0.50099700 |
| H | 4.36953900  | -4.09916200 | -0.14436800 |
| H | 3.16880500  | -3.04385100 | -0.91108100 |
| H | 4.88863600  | -2.87188100 | -1.31168600 |
| C | 3.70371700  | 1.97658200  | -0.85960500 |
| H | 3.52831300  | 2.96929300  | -1.26024200 |
| C | -2.38132100 | 1.17166600  | -0.92862800 |
| C | -4.59718500 | 1.92519700  | -0.25446100 |
| C | -3.31858400 | 2.19053100  | -0.75249200 |
| C | -1.05838500 | 1.46261800  | -1.58071500 |
| H | -0.97258300 | 2.54298900  | -1.76363600 |
| H | -0.99164300 | 0.95934500  | -2.54958500 |
| H | 1.33211400  | 2.49383600  | -1.75158300 |
| H | 1.27429000  | 0.91467900  | -2.54786800 |
| H | -3.03783600 | 3.20051600  | -1.03272000 |
| C | -5.65770200 | 3.01826300  | -0.04222100 |
| C | -6.08179500 | 3.03873200  | 1.44670600  |
| C | -5.13416100 | 4.41939300  | -0.41279200 |
| C | -6.89374500 | 2.71564700  | -0.92437400 |
| H | -6.50806900 | 2.08189600  | 1.76584100  |
| H | -5.22753100 | 3.26017900  | 2.09705900  |
| H | -6.84168500 | 3.81105600  | 1.61174700  |
| H | -4.85385300 | 4.48688900  | -1.47028900 |
| H | -5.91857000 | 5.16253200  | -0.23558900 |
| H | -4.26753900 | 4.70768000  | 0.19396500  |
| H | -7.65765100 | 3.48822300  | -0.78013500 |
| H | -6.62501400 | 2.69873800  | -1.98659000 |
| H | -7.34820300 | 1.75067400  | -0.67694000 |
| H | 7.66079400  | 1.10859300  | -0.69702000 |
| H | 8.15813800  | 2.77045300  | -1.03860500 |
| H | -0.24609800 | -3.67440600 | -0.37691500 |
| O | -1.36226100 | -4.34452300 | -2.00098300 |
| H | -1.30679800 | -5.15292100 | -2.53615900 |
| H | -2.29912500 | -4.23422000 | -1.76622300 |
| O | 0.12443200  | -1.02322600 | -2.48161800 |
| O | 0.38999200  | -2.40981900 | -2.34379600 |
| H | -0.46200400 | -2.89501200 | -2.52835000 |

**Ts2**

|   |             |             |             |
|---|-------------|-------------|-------------|
| V | 0.07287100  | -1.24142300 | -0.72049300 |
| O | -1.72453100 | -1.07973200 | -0.75760800 |
| O | 1.82529700  | -1.08554700 | -0.43329900 |
| O | -0.07770000 | -3.04319600 | 0.06111200  |
| N | 0.14814800  | 1.02289300  | -0.78294900 |
| N | -0.21346300 | -0.60378900 | 1.39416600  |
| C | -0.48124600 | -1.48091400 | 2.38187400  |
| H | -0.45201500 | -2.52237300 | 2.08928100  |
| C | -0.78750600 | -1.07775500 | 3.67562300  |
| H | -0.98782100 | -1.82385900 | 4.43692500  |
| C | -0.84274700 | 0.28721100  | 3.95952400  |
| H | -1.09220800 | 0.63896500  | 4.95606300  |
| C | -0.57294300 | 1.19286800  | 2.93890200  |
| H | -0.60271000 | 2.26336200  | 3.11682000  |
| C | -0.25049300 | 0.71151700  | 1.66799600  |
| C | 0.16564300  | 1.64956200  | 0.57149100  |
| H | 1.19049200  | 1.97344800  | 0.78110800  |
| H | -0.46354700 | 2.54659200  | 0.57712700  |
| C | -4.89287000 | 0.55541200  | 0.03255500  |
| H | -5.88863200 | 0.32534000  | 0.38696800  |
| C | -4.00441400 | -0.50867100 | -0.14829600 |
| C | -2.70002400 | -0.16155700 | -0.60226000 |
| C | -4.45981700 | -1.96725700 | 0.06255800  |
| C | -4.40508200 | -2.70381300 | -1.29912400 |
| H | -5.07050200 | -2.22387500 | -2.02569800 |
| H | -3.39598700 | -2.72079500 | -1.71520900 |
| H | -4.73579900 | -3.74208500 | -1.17576900 |
| C | -3.56309700 | -2.69015400 | 1.09364100  |
| H | -2.52742900 | -2.76063200 | 0.75978800  |
| H | -3.58230800 | -2.17045300 | 2.05902700  |
| H | -3.93666400 | -3.70818400 | 1.25618500  |
| C | -5.91124200 | -2.05538200 | 0.57935700  |
| H | -6.03642000 | -1.56305600 | 1.55063100  |
| H | -6.63168900 | -1.62521700 | -0.12467900 |
| H | -6.17738400 | -3.10944500 | 0.70972400  |
| C | 1.37861100  | 1.45075800  | -1.54149100 |
| C | 2.67797500  | 1.06730600  | -0.87888000 |
| C | 2.86382100  | -0.23286300 | -0.36990900 |
| C | 4.10917500  | -0.64383500 | 0.17818800  |
| C | 5.11868300  | 0.32088500  | 0.20090500  |
| H | 6.08098100  | 0.03935700  | 0.60760700  |
| C | 4.96858400  | 1.63791600  | -0.27236800 |
| C | 6.14965600  | 2.61956900  | -0.19247100 |
| C | 7.33461100  | 2.06228100  | -1.01910300 |
| H | 7.05816600  | 1.94176700  | -2.07257500 |
| C | 5.79028900  | 4.01227500  | -0.74505200 |
| H | 6.65767800  | 4.67513700  | -0.66068500 |
| H | 5.51073500  | 3.97501700  | -1.80428600 |
| H | 4.96942300  | 4.47647600  | -0.18569800 |
| C | 6.58450900  | 2.78305900  | 1.28445100  |



|   |             |             |             |
|---|-------------|-------------|-------------|
| H | 6.89990600  | 1.83349200  | 1.72920300  |
| H | 7.43049200  | 3.47639900  | 1.35188200  |
| H | 5.76768900  | 3.18595400  | 1.89440100  |
| C | 4.34491700  | -2.08112900 | 0.68506500  |
| C | 3.39380400  | -2.39740400 | 1.86503000  |
| H | 2.34195700  | -2.32491100 | 1.57854500  |
| H | 3.58007100  | -3.41425800 | 2.23075400  |
| H | 3.56338200  | -1.70734700 | 2.69965400  |
| C | 5.78703200  | -2.28707100 | 1.19297000  |
| H | 6.02269800  | -1.63722800 | 2.04301700  |
| H | 5.90396700  | -3.32206000 | 1.53098600  |
| H | 6.52987800  | -2.11464400 | 0.40668400  |
| C | 4.11616600  | -3.08716800 | -0.47183100 |
| H | 4.27541600  | -4.11082800 | -0.11197400 |
| H | 3.10770400  | -3.01815100 | -0.88938000 |
| H | 4.82439400  | -2.90710300 | -1.28822400 |
| C | 3.72482100  | 1.98750400  | -0.80849700 |
| H | 3.55736700  | 2.98589700  | -1.19836700 |
| C | -2.37553500 | 1.17547900  | -0.91564000 |
| C | -4.59009600 | 1.90570400  | -0.22026700 |
| C | -3.31239600 | 2.18836400  | -0.71059300 |
| C | -1.05259600 | 1.49463400  | -1.55767900 |
| H | -0.96602100 | 2.58109200  | -1.69146400 |
| H | -0.98375300 | 1.03183700  | -2.54559300 |
| H | 1.34212900  | 2.54179400  | -1.66257900 |
| H | 1.30379900  | 1.00088200  | -2.53356700 |
| H | -3.03223300 | 3.20616100  | -0.96121000 |
| C | -5.65241300 | 2.98976500  | 0.02619200  |
| C | -6.06949300 | 2.96783200  | 1.51701400  |
| C | -5.13399100 | 4.40174700  | -0.30831600 |
| C | -6.89142100 | 2.70789800  | -0.85864700 |
| H | -6.48893100 | 2.00041600  | 1.81208300  |
| H | -5.21340900 | 3.17662600  | 2.16926600  |
| H | -6.83267900 | 3.73131400  | 1.70606100  |
| H | -4.85822700 | 4.49845300  | -1.36473600 |
| H | -5.91981500 | 5.13752000  | -0.10820500 |
| H | -4.26601900 | 4.67642500  | 0.30290500  |
| H | -7.65636500 | 3.47425300  | -0.68924600 |
| H | -6.62765700 | 2.72117100  | -1.92211800 |
| H | -7.34234400 | 1.73526400  | -0.63636500 |
| H | 7.67457700  | 1.09005100  | -0.64721100 |
| H | 8.18497200  | 2.75181900  | -0.96844100 |
| H | 0.81558400  | -3.42446000 | 0.13097100  |
| O | -1.21353900 | -3.98579100 | -1.94335100 |
| H | -0.89129200 | -4.84016100 | -2.28328500 |
| O | 0.17135300  | -0.91706600 | -2.56614000 |
| O | 0.38424600  | -2.27989200 | -2.34962500 |
| H | -0.59450800 | -3.10526700 | -2.39553400 |
| H | -0.83220000 | -3.81455200 | -0.96492000 |

|   |             |             |             |
|---|-------------|-------------|-------------|
| V | 0.06872200  | -1.16444300 | -0.90579100 |
| O | -1.73690200 | -1.08052800 | -0.95269200 |
| O | 1.81912500  | -1.11947700 | -0.47743000 |
| N | 0.13308000  | 1.00106400  | -0.67122100 |
| N | -0.31942700 | -0.89691400 | 1.28861400  |
| C | -0.67066900 | -1.87513700 | 2.14559300  |
| H | -0.62059200 | -2.88439300 | 1.75965500  |
| C | -1.07963200 | -1.61820200 | 3.44860400  |
| H | -1.34192800 | -2.44306600 | 4.10205500  |
| C | -1.15373300 | -0.29337000 | 3.87991800  |
| H | -1.48357400 | -0.05404800 | 4.88627700  |
| C | -0.79640000 | 0.71933900  | 2.99520700  |
| H | -0.83689400 | 1.76259000  | 3.29192900  |
| C | -0.37077800 | 0.37978400  | 1.70947600  |
| C | 0.16448800  | 1.41755900  | 0.76673900  |
| H | 1.21070300  | 1.60032800  | 1.03323300  |
| H | -0.37173100 | 2.36548600  | 0.88442300  |
| C | -4.96166000 | 0.37742100  | -0.08438900 |
| H | -5.97325800 | 0.08426500  | 0.16297900  |
| C | -4.04640100 | -0.63269500 | -0.39598300 |
| C | -2.72691600 | -0.20343200 | -0.69882000 |
| C | -4.47197300 | -2.11416200 | -0.47507000 |
| C | -4.20879000 | -2.64273600 | -1.90828500 |
| H | -4.79100100 | -2.07730800 | -2.64433400 |
| H | -3.15335800 | -2.57070300 | -2.18477200 |
| H | -4.51169100 | -3.69426300 | -1.97892800 |
| C | -3.69231600 | -2.97207900 | 0.54853500  |
| H | -2.62308500 | -2.99030800 | 0.32860400  |
| H | -3.82931200 | -2.59221600 | 1.56767700  |
| H | -4.05994100 | -4.00471400 | 0.52357300  |
| C | -5.97480500 | -2.29926000 | -0.18011400 |
| H | -6.23919700 | -1.99131200 | 0.83797800  |
| H | -6.60501300 | -1.74652500 | -0.88510700 |
| H | -6.23060900 | -3.35951200 | -0.27728000 |
| C | 1.36360200  | 1.54516000  | -1.35826900 |
| C | 2.67139200  | 1.07321200  | -0.76854600 |
| C | 2.85987900  | -0.26659600 | -0.37442400 |
| C | 4.11445800  | -0.71851700 | 0.11580000  |
| C | 5.13486000  | 0.23264700  | 0.18161500  |
| H | 6.10386900  | -0.08553100 | 0.54315600  |
| C | 4.98595400  | 1.58151200  | -0.19013100 |
| C | 6.17934700  | 2.54513400  | -0.07364700 |
| C | 7.33816400  | 2.03339100  | -0.96416100 |
| H | 7.03377600  | 1.98105700  | -2.01552200 |
| C | 5.82212100  | 3.97465700  | -0.52387900 |
| H | 6.69903000  | 4.62186900  | -0.41886400 |
| H | 5.51464100  | 4.00950100  | -1.57543800 |
| H | 5.02147700  | 4.40922400  | 0.08635300  |
| C | 6.65077900  | 2.60550300  | 1.39964100  |
| H | 6.96064200  | 1.62392900  | 1.77324800  |

|   |             |             |             |
|---|-------------|-------------|-------------|
| H | 7.50931800  | 3.28032100  | 1.49244600  |
| H | 5.85478200  | 2.97917000  | 2.05415500  |
| C | 4.34649300  | -2.18639100 | 0.53131100  |
| C | 3.41992700  | -2.55710100 | 1.71571300  |
| H | 2.36233100  | -2.42710900 | 1.47152900  |
| H | 3.58264400  | -3.60168000 | 2.00732600  |
| H | 3.63698300  | -1.93141300 | 2.58905100  |
| C | 5.79683500  | -2.43724500 | 0.99481900  |
| H | 6.05833500  | -1.83951400 | 1.87483300  |
| H | 5.90931500  | -3.49105300 | 1.27090700  |
| H | 6.52417000  | -2.22753100 | 0.20326600  |
| C | 4.08764200  | -3.12600800 | -0.67356600 |
| H | 4.22988300  | -4.17092000 | -0.37242000 |
| H | 3.07973000  | -3.01240200 | -1.08514100 |
| H | 4.78963800  | -2.91649300 | -1.48806000 |
| C | 3.73048400  | 1.97825000  | -0.65688300 |
| H | 3.55998900  | 3.00595800  | -0.95984800 |
| C | -2.40563300 | 1.16729500  | -0.77700800 |
| C | -4.66401800 | 1.75268100  | -0.08472600 |
| C | -3.36890700 | 2.12506800  | -0.45838600 |
| C | -1.07778400 | 1.58803000  | -1.35181000 |
| H | -0.98835600 | 2.68099100  | -1.30810900 |
| H | -1.00799600 | 1.28716700  | -2.40087000 |
| H | 1.31910600  | 2.64080700  | -1.30354400 |
| H | 1.28228700  | 1.26333600  | -2.41004900 |
| H | -3.09898100 | 3.17330600  | -0.53164600 |
| C | -5.75506500 | 2.77357000  | 0.28112800  |
| C | -6.26781900 | 2.48707400  | 1.71351600  |
| C | -5.23573000 | 4.22356600  | 0.23643800  |
| C | -6.93075600 | 2.65039500  | -0.71917500 |
| H | -6.69881400 | 1.48445400  | 1.80312900  |
| H | -5.45804900 | 2.57245300  | 2.44757700  |
| H | -7.04767500 | 3.20750800  | 1.98525600  |
| H | -4.89836000 | 4.50814100  | -0.76690000 |
| H | -6.04113000 | 4.91075800  | 0.51556500  |
| H | -4.40908300 | 4.38543500  | 0.93861600  |
| H | -7.71776200 | 3.36973700  | -0.46543200 |
| H | -6.59997300 | 2.85698300  | -1.74319800 |
| H | -7.37857200 | 1.65136000  | -0.70546800 |
| H | 7.67957300  | 1.03752200  | -0.66283000 |
| H | 8.19556400  | 2.71229800  | -0.89270300 |
| O | 0.11413100  | -3.27775400 | -0.30007300 |
| H | 1.06317400  | -3.50834100 | -0.29406100 |
| O | 0.30072400  | -0.68719700 | -2.67920000 |
| O | 0.25310000  | -2.05025000 | -2.49210100 |
| H | -0.28245500 | -3.80071600 | -1.02153800 |

|   |             |             |             |
|---|-------------|-------------|-------------|
| V | 0.03927100  | -1.17815200 | -1.00150700 |
| O | -1.76456500 | -1.14544700 | -0.93324200 |
| O | 1.80091400  | -1.18138300 | -0.66365300 |
| N | 0.07531500  | 0.93340500  | -0.71641800 |
| N | -0.16381500 | -1.08969900 | 1.14433400  |
| C | -0.33047900 | -2.16452100 | 1.93692500  |
| H | -0.28112700 | -3.13657600 | 1.45499400  |
| C | -0.55675500 | -2.04831700 | 3.30150800  |
| H | -0.67967400 | -2.93858400 | 3.90804500  |
| C | -0.62710200 | -0.76842000 | 3.85720500  |
| H | -0.81258200 | -0.63787200 | 4.91888100  |
| C | -0.45446900 | 0.34040000  | 3.03353600  |
| H | -0.49860900 | 1.34747500  | 3.43611300  |
| C | -0.21283500 | 0.14360200  | 1.67221100  |
| C | 0.08592700  | 1.29463300  | 0.74781700  |
| H | 1.08455700  | 1.67240800  | 0.98851600  |
| H | -0.62555400 | 2.10853200  | 0.91714200  |
| C | -4.97991000 | 0.28737200  | 0.01638800  |
| H | -5.97782700 | -0.01340900 | 0.30596800  |
| C | -4.05906200 | -0.71897400 | -0.29141800 |
| C | -2.75905400 | -0.27884800 | -0.65413200 |
| C | -4.46013200 | -2.20898900 | -0.30213700 |
| C | -4.24596100 | -2.78453700 | -1.72541700 |
| H | -4.86459900 | -2.25272400 | -2.45680800 |
| H | -3.20310500 | -2.71420000 | -2.04554100 |
| H | -4.53703000 | -3.84112800 | -1.74525800 |
| C | -3.62168100 | -3.01515200 | 0.71722600  |
| H | -2.56340000 | -3.02376600 | 0.44856100  |
| H | -3.72259500 | -2.60287200 | 1.72818000  |
| H | -3.96756000 | -4.05478500 | 0.74175200  |
| C | -5.94550800 | -2.40828000 | 0.06437000  |
| H | -6.17293800 | -2.06400100 | 1.07984700  |
| H | -6.61550400 | -1.89627300 | -0.63472100 |
| H | -6.18453500 | -3.47583700 | 0.02034800  |
| C | 1.31257100  | 1.49467100  | -1.38397500 |
| C | 2.61404300  | 1.03089000  | -0.77710700 |
| C | 2.83222100  | -0.33035000 | -0.47573200 |
| C | 4.09335300  | -0.79138800 | -0.01592700 |
| C | 5.08124200  | 0.18363300  | 0.14808700  |
| H | 6.05487500  | -0.13658900 | 0.49455200  |
| C | 4.89838300  | 1.55461700  | -0.10937500 |
| C | 6.05963400  | 2.53864500  | 0.11370000  |
| C | 7.24765500  | 2.14248300  | -0.79706200 |
| H | 6.96231900  | 2.17577700  | -1.85447300 |
| C | 5.66476900  | 3.99130700  | -0.21406600 |
| H | 6.51861700  | 4.65245400  | -0.03371600 |
| H | 5.37570800  | 4.11171300  | -1.26454600 |
| H | 4.83979300  | 4.34489400  | 0.41591800  |
| C | 6.50482700  | 2.48045000  | 1.59530000  |
| H | 6.84188000  | 1.47960700  | 1.88444300  |

|   |             |             |             |
|---|-------------|-------------|-------------|
| H | 7.33824400  | 3.17145800  | 1.76481300  |
| H | 5.68626100  | 2.76722100  | 2.26572000  |
| C | 4.37380100  | -2.28445200 | 0.25149900  |
| C | 3.45968000  | -2.80487100 | 1.38694000  |
| H | 2.40216200  | -2.72385500 | 1.12612600  |
| H | 3.67878100  | -3.86017900 | 1.58636500  |
| H | 3.62939000  | -2.24535900 | 2.31451600  |
| C | 5.83286500  | -2.52867600 | 0.68928100  |
| H | 6.07698600  | -2.01863400 | 1.62812300  |
| H | 5.98184000  | -3.60099500 | 0.85292200  |
| H | 6.55092300  | -2.21335200 | -0.07549000 |
| C | 4.13497200  | -3.10171600 | -1.04332700 |
| H | 4.33736700  | -4.16234400 | -0.85445100 |
| H | 3.10918700  | -3.01206200 | -1.40935300 |
| H | 4.80899700  | -2.76949100 | -1.84074100 |
| C | 3.64217100  | 1.95452500  | -0.57411200 |
| H | 3.45122400  | 2.99677300  | -0.80682400 |
| C | -2.45985600 | 1.09420100  | -0.78056500 |
| C | -4.70609000 | 1.66649200  | -0.03911300 |
| C | -3.42805200 | 2.04720500  | -0.46050300 |
| C | -1.14679100 | 1.52299000  | -1.38324600 |
| H | -1.05579000 | 2.61492500  | -1.33292400 |
| H | -1.08694600 | 1.22817200  | -2.43506700 |
| H | 1.25281500  | 2.58868600  | -1.32709700 |
| H | 1.24324800  | 1.21091100  | -2.43746000 |
| H | -3.17703500 | 3.09698200  | -0.56994100 |
| C | -5.80333500 | 2.68145800  | 0.32452100  |
| C | -6.27251700 | 2.43353800  | 1.77899900  |
| C | -5.30940700 | 4.13715100  | 0.21918100  |
| C | -7.00296500 | 2.50665500  | -0.63908400 |
| H | -6.68328400 | 1.42748400  | 1.91353400  |
| H | -5.44549600 | 2.55783100  | 2.48783800  |
| H | -7.05770800 | 3.14923700  | 2.04751800  |
| H | -5.00296300 | 4.39414100  | -0.80138000 |
| H | -6.11888000 | 4.82005800  | 0.49669700  |
| H | -4.46835700 | 4.33529300  | 0.89447700  |
| H | -7.79435400 | 3.22166200  | -0.38715800 |
| H | -6.70357000 | 2.68451700  | -1.67803000 |
| H | -7.43374800 | 1.50180400  | -0.58048100 |
| H | 7.61437300  | 1.13397900  | -0.57929200 |
| H | 8.08237000  | 2.83704900  | -0.64910800 |
| O | 0.18247400  | -0.77109700 | -2.80625400 |
| O | 0.13020000  | -2.12471700 | -2.52349900 |

**Ts3**

|   |             |             |             |
|---|-------------|-------------|-------------|
| V | 0.04232800  | -1.42610000 | -0.17846100 |
| O | -1.73981200 | -1.15968500 | -0.48307200 |
| O | 1.81535000  | -1.08137400 | -0.04797200 |
| N | 0.10437700  | 0.94078300  | -0.72525600 |
| N | -0.33056900 | -0.31330600 | 1.72791100  |
| C | -0.64543500 | -0.98396100 | 2.84928300  |
| H | -0.56260600 | -2.06323600 | 2.77701400  |
| C | -1.05596700 | -0.34623900 | 4.01378500  |
| H | -1.29356900 | -0.93311200 | 4.89449700  |
| C | -1.16540500 | 1.04446400  | 4.00916800  |
| H | -1.49990100 | 1.57870500  | 4.89388200  |
| C | -0.83615400 | 1.73860600  | 2.84980300  |
| H | -0.90067500 | 2.82156300  | 2.80773300  |
| C | -0.40595400 | 1.03005000  | 1.72405100  |
| C | 0.10884000  | 1.75738400  | 0.50869900  |
| H | 1.14678900  | 2.03730900  | 0.72235900  |
| H | -0.45118700 | 2.69068400  | 0.36379400  |
| C | -4.93572700 | 0.49283700  | 0.03823500  |
| H | -5.93812900 | 0.27919100  | 0.38778500  |
| C | -4.02032200 | -0.56326200 | -0.00698100 |
| C | -2.70846400 | -0.23888200 | -0.45106700 |
| C | -4.42569500 | -2.00917100 | 0.34222000  |
| C | -4.21850700 | -2.90952400 | -0.90227400 |
| H | -4.83287400 | -2.56048900 | -1.74093800 |
| H | -3.17353800 | -2.92242400 | -1.21998400 |
| H | -4.51760200 | -3.93926600 | -0.67033000 |
| C | -3.58093300 | -2.55707400 | 1.51722100  |
| H | -2.52776800 | -2.65702000 | 1.24863600  |
| H | -3.66451700 | -1.90528700 | 2.39608500  |
| H | -3.94831900 | -3.55099200 | 1.80216000  |
| C | -5.90992800 | -2.10765400 | 0.75104000  |
| H | -6.13089000 | -1.52639800 | 1.65455400  |
| H | -6.58296400 | -1.77430700 | -0.04735900 |
| H | -6.15209900 | -3.15390000 | 0.96705400  |
| C | 1.32633100  | 1.22370200  | -1.54622400 |
| C | 2.62498400  | 0.99852500  | -0.82257600 |
| C | 2.81933800  | -0.20295800 | -0.11848700 |
| C | 4.07007900  | -0.49409700 | 0.49404000  |
| C | 5.06109600  | 0.48452400  | 0.38084900  |
| H | 6.02195500  | 0.28936600  | 0.84030000  |
| C | 4.89338900  | 1.70866500  | -0.29285100 |
| C | 6.05495700  | 2.71728900  | -0.35231700 |
| C | 7.26549900  | 2.06988600  | -1.06736500 |
| H | 7.00725800  | 1.78392400  | -2.09333500 |
| C | 5.67618200  | 3.99900100  | -1.11904900 |
| H | 6.52969900  | 4.68612900  | -1.13423800 |
| H | 5.40548800  | 3.78666200  | -2.15963700 |
| H | 4.83787000  | 4.52453000  | -0.64672400 |
| C | 6.46588300  | 3.12120700  | 1.08407000  |
| H | 6.79385300  | 2.25800300  | 1.67241300  |

|    |             |             |             |
|----|-------------|-------------|-------------|
| H  | 7.29430700  | 3.83982500  | 1.05651200  |
| H  | 5.62817600  | 3.58874300  | 1.61472000  |
| C  | 4.32105000  | -1.83184300 | 1.21799200  |
| C  | 3.33061000  | -2.00320900 | 2.39663000  |
| H  | 2.29941100  | -2.08579100 | 2.04896300  |
| H  | 3.57181400  | -2.91884500 | 2.95090900  |
| H  | 3.40389500  | -1.15970600 | 3.09506700  |
| C  | 5.74879300  | -1.91318200 | 1.79675100  |
| H  | 5.94057400  | -1.13163000 | 2.54193800  |
| H  | 5.87792100  | -2.88024400 | 2.29496500  |
| H  | 6.51605100  | -1.84295900 | 1.01695900  |
| C  | 4.15141400  | -3.00537000 | 0.22019300  |
| H  | 4.34677100  | -3.95657700 | 0.73070500  |
| H  | 3.14257700  | -3.04449700 | -0.19524900 |
| H  | 4.86420800  | -2.91468900 | -0.60814000 |
| C  | 3.65306400  | 1.94186300  | -0.89095200 |
| H  | 3.46648500  | 2.86150700  | -1.43649400 |
| C  | -2.40750000 | 1.05448500  | -0.91102000 |
| C  | -4.64697200 | 1.81500900  | -0.34951400 |
| C  | -3.36556300 | 2.06761700  | -0.84447200 |
| C  | -1.07868100 | 1.26946600  | -1.57604000 |
| H  | -0.99650600 | 2.31634100  | -1.90887200 |
| H  | -0.99969900 | 0.62613800  | -2.45892100 |
| H  | 1.28433000  | 2.26439100  | -1.90463000 |
| H  | 1.25944200  | 0.56576200  | -2.41797700 |
| H  | -3.09496200 | 3.05466500  | -1.20652100 |
| C  | -5.73489300 | 2.89921600  | -0.24586800 |
| C  | -6.20531800 | 3.02287900  | 1.22343700  |
| C  | -5.22694100 | 4.28094500  | -0.70130800 |
| C  | -6.94019500 | 2.51307200  | -1.13679300 |
| H  | -6.61995400 | 2.08185300  | 1.59967200  |
| H  | -5.37336800 | 3.30698500  | 1.87855800  |
| H  | -6.98497200 | 3.78954300  | 1.31209600  |
| H  | -4.91405300 | 4.27594300  | -1.75175800 |
| H  | -6.02874300 | 5.02112200  | -0.60090100 |
| H  | -4.38160400 | 4.62527800  | -0.09373400 |
| H  | -7.72592500 | 3.27585400  | -1.06983800 |
| H  | -6.63817300 | 2.42630500  | -2.18665900 |
| H  | -7.37841200 | 1.55605400  | -0.83553400 |
| H  | 7.61144000  | 1.17048800  | -0.54760400 |
| H  | 8.10526400  | 2.77447300  | -1.11100300 |
| O  | 0.14250900  | -3.02790800 | -0.87263300 |
| O  | -0.04029000 | -2.78831200 | 0.88685800  |
| Br | 0.33724100  | -2.02501100 | -2.93703500 |

|   |             |             |             |
|---|-------------|-------------|-------------|
| V | 0.08471500  | -1.43278300 | -0.06000800 |
| O | -1.74951500 | -1.15093400 | -0.19612200 |
| O | 1.90271100  | -1.15736200 | 0.06131800  |
| N | 0.18589400  | 0.88993300  | -0.83620000 |
| N | -0.10638500 | -0.11023200 | 1.73273700  |
| C | -0.33135400 | -0.67305600 | 2.93578000  |
| H | -0.30893600 | -1.75638300 | 2.95228500  |
| C | -0.58069600 | 0.07665400  | 4.07812200  |
| H | -0.75177900 | -0.42273900 | 5.02580100  |
| C | -0.61376600 | 1.46779500  | 3.96744700  |
| H | -0.81742800 | 2.08931200  | 4.83485500  |
| C | -0.38142000 | 2.04687500  | 2.72528200  |
| H | -0.39615000 | 3.12544600  | 2.59910200  |
| C | -0.11868900 | 1.22811800  | 1.62143600  |
| C | 0.24601500  | 1.84294500  | 0.28541500  |
| H | 1.27316100  | 2.21528900  | 0.37225500  |
| H | -0.39460000 | 2.71547100  | 0.10091500  |
| C | -4.82277500 | 0.75059100  | 0.19648000  |
| H | -5.81166700 | 0.64897700  | 0.62605200  |
| C | -3.95735900 | -0.34324400 | 0.27654000  |
| C | -2.65512000 | -0.17538100 | -0.28209200 |
| C | -4.41226300 | -1.68655600 | 0.88424000  |
| C | -4.36788600 | -2.77885300 | -0.21367000 |
| H | -5.05713800 | -2.53433200 | -1.03114300 |
| H | -3.36406900 | -2.88781000 | -0.62947200 |
| H | -4.67326200 | -3.74524700 | 0.20717600  |
| C | -3.50009500 | -2.10470500 | 2.06165300  |
| H | -2.48169000 | -2.30264300 | 1.72560700  |
| H | -3.47477600 | -1.32456100 | 2.83273300  |
| H | -3.88987800 | -3.02049900 | 2.52374600  |
| C | -5.85751600 | -1.62117900 | 1.42015200  |
| H | -5.96756500 | -0.88775100 | 2.22823100  |
| H | -6.58117600 | -1.37886000 | 0.63342000  |
| H | -6.13316000 | -2.60086900 | 1.82600200  |
| C | 1.38708200  | 0.96778100  | -1.71696600 |
| C | 2.69614400  | 0.81512500  | -0.99207900 |
| C | 2.89443600  | -0.29101200 | -0.13909200 |
| C | 4.16178400  | -0.49738800 | 0.48389300  |
| C | 5.15257600  | 0.45273700  | 0.22822500  |
| H | 6.12125800  | 0.31542400  | 0.69201700  |
| C | 4.97744600  | 1.57820900  | -0.59815300 |
| C | 6.14219100  | 2.56189400  | -0.80805400 |
| C | 7.34008400  | 1.81650700  | -1.44484500 |
| H | 7.06399800  | 1.39126000  | -2.41646300 |
| C | 5.76060800  | 3.73160900  | -1.73542700 |
| H | 6.61661300  | 4.40614800  | -1.85004200 |
| H | 5.47843000  | 3.38425800  | -2.73591000 |
| H | 4.92919200  | 4.31944000  | -1.32918000 |
| C | 6.57503900  | 3.15315900  | 0.55533800  |
| H | 6.89185500  | 2.37409300  | 1.25663100  |



|    |             |             |             |
|----|-------------|-------------|-------------|
| H  | 7.41687300  | 3.84409400  | 0.42292500  |
| H  | 5.75150900  | 3.70689600  | 1.02130300  |
| C  | 4.43428700  | -1.72829800 | 1.37248900  |
| C  | 3.47910700  | -1.73631000 | 2.59076200  |
| H  | 2.43656000  | -1.80894700 | 2.27913600  |
| H  | 3.70441500  | -2.59694500 | 3.23284600  |
| H  | 3.60541200  | -0.82653900 | 3.19099800  |
| C  | 5.87704400  | -1.74128900 | 1.91861000  |
| H  | 6.08856300  | -0.87200100 | 2.55277500  |
| H  | 6.01899700  | -2.63756000 | 2.53262800  |
| H  | 6.62329300  | -1.77315600 | 1.11637800  |
| C  | 4.23632200  | -3.02393200 | 0.54581800  |
| H  | 4.43586200  | -3.90046600 | 1.17498700  |
| H  | 3.21843500  | -3.10393200 | 0.16005400  |
| H  | 4.93182600  | -3.05279700 | -0.30167500 |
| C  | 3.72782200  | 1.73453200  | -1.20076900 |
| H  | 3.53487200  | 2.57520100  | -1.86010900 |
| C  | -2.32451700 | 1.02183800  | -0.94904900 |
| C  | -4.50002800 | 1.97678400  | -0.41394800 |
| C  | -3.23592100 | 2.07969400  | -0.99688800 |
| C  | -1.01594700 | 1.10808600  | -1.68491100 |
| H  | -0.93932000 | 2.09166900  | -2.17758700 |
| H  | -0.97439300 | 0.34261100  | -2.46721900 |
| H  | 1.38507800  | 1.92394600  | -2.26557000 |
| H  | 1.26386500  | 0.16176700  | -2.44936500 |
| H  | -2.93967400 | 2.98470300  | -1.51852100 |
| C  | -5.53286200 | 3.11781500  | -0.43460700 |
| C  | -5.90054000 | 3.51023800  | 1.01660000  |
| C  | -5.00039100 | 4.37497200  | -1.14859100 |
| C  | -6.80940500 | 2.65200000  | -1.17570600 |
| H  | -6.31780800 | 2.66489600  | 1.57364700  |
| H  | -5.01803800 | 3.86598000  | 1.56126700  |
| H  | -6.64822400 | 4.31322400  | 1.01856000  |
| H  | -4.75557600 | 4.17503500  | -2.19804800 |
| H  | -5.76361800 | 5.16132900  | -1.13223400 |
| H  | -4.10474900 | 4.77409700  | -0.65811300 |
| H  | -7.55531700 | 3.45640700  | -1.19589500 |
| H  | -6.58049800 | 2.37349200  | -2.21066200 |
| H  | -7.26938800 | 1.78437600  | -0.69115500 |
| H  | 7.69414200  | 0.99702700  | -0.81086100 |
| H  | 8.18020700  | 2.50489500  | -1.60013000 |
| O  | 0.29780800  | -1.92963000 | -1.83869500 |
| O  | -0.00429700 | -2.75940400 | 0.81125200  |
| Br | -0.87970900 | -3.07904300 | -2.67769100 |

|   |             |             |             |
|---|-------------|-------------|-------------|
| V | 0.07081100  | -1.24711500 | 0.19147800  |
| O | -1.71103700 | -1.01872600 | -0.03447500 |
| O | 1.88345400  | -1.02145200 | 0.10828900  |
| N | 0.13321600  | 0.97059600  | -0.77368500 |
| N | -0.05532400 | 0.03537100  | 1.85415400  |
| C | -0.21482200 | -0.48706300 | 3.09207300  |
| H | -0.19699000 | -1.56810600 | 3.15072900  |
| C | -0.39631900 | 0.30408700  | 4.21562200  |
| H | -0.51690800 | -0.16227600 | 5.18713700  |
| C | -0.42650800 | 1.69128700  | 4.05935500  |
| H | -0.57537900 | 2.34316200  | 4.91480600  |
| C | -0.26194400 | 2.22594300  | 2.78680600  |
| H | -0.27505800 | 3.29972400  | 2.62723700  |
| C | -0.06906700 | 1.37512900  | 1.69463700  |
| C | 0.20335100  | 1.96003500  | 0.32442100  |
| H | 1.21051300  | 2.39071000  | 0.34936700  |
| H | -0.49016800 | 2.79078500  | 0.14659900  |
| C | -4.88887600 | 0.72198000  | 0.24148100  |
| H | -5.87652200 | 0.59589100  | 0.66437900  |
| C | -3.97777300 | -0.32681600 | 0.38240900  |
| C | -2.68237500 | -0.10677500 | -0.17169000 |
| C | -4.37374500 | -1.65168500 | 1.06504600  |
| C | -4.24400600 | -2.81111100 | 0.04553300  |
| H | -4.91002300 | -2.65264400 | -0.81052700 |
| H | -3.22186100 | -2.91173400 | -0.32616100 |
| H | -4.52865300 | -3.75698900 | 0.52105900  |
| C | -3.47012400 | -1.93453200 | 2.28946000  |
| H | -2.43325000 | -2.10469300 | 1.99510000  |
| H | -3.50472200 | -1.10345300 | 3.00444700  |
| H | -3.82367400 | -2.83439900 | 2.80609600  |
| C | -5.83396100 | -1.62960000 | 1.56280500  |
| H | -6.00302800 | -0.85658700 | 2.32136500  |
| H | -6.54768100 | -1.47686800 | 0.74581600  |
| H | -6.06861300 | -2.59516000 | 2.02254200  |
| C | 1.31996100  | 1.05376700  | -1.68182900 |
| C | 2.64618600  | 0.93148700  | -0.98559100 |
| C | 2.88270400  | -0.16371900 | -0.12696900 |
| C | 4.16734400  | -0.36146100 | 0.46416000  |
| C | 5.13671600  | 0.60027100  | 0.17510200  |
| H | 6.11769300  | 0.48167800  | 0.61545300  |
| C | 4.92687500  | 1.71791600  | -0.65599500 |
| C | 6.07269000  | 2.71185700  | -0.90490500 |
| C | 7.25694100  | 1.96993900  | -1.57264400 |
| H | 6.95953500  | 1.53858000  | -2.53505400 |
| C | 5.65043900  | 3.87301500  | -1.82540900 |
| H | 6.49545400  | 4.55493800  | -1.96540300 |
| H | 5.34731500  | 3.52115100  | -2.81820100 |
| H | 4.82664200  | 4.45636600  | -1.39760300 |
| C | 6.53711900  | 3.30964900  | 0.44626200  |
| H | 6.89098900  | 2.53859900  | 1.13850900  |

|    |             |             |             |
|----|-------------|-------------|-------------|
| H  | 7.36334300  | 4.01062700  | 0.28239300  |
| H  | 5.72311900  | 3.85536500  | 0.93729900  |
| C  | 4.48408500  | -1.57434700 | 1.36259300  |
| C  | 3.55373300  | -1.59404400 | 2.59972500  |
| H  | 2.50692600  | -1.71756500 | 2.31779900  |
| H  | 3.82949100  | -2.42765900 | 3.25628000  |
| H  | 3.65506600  | -0.66745400 | 3.17683400  |
| C  | 5.93778100  | -1.55281000 | 1.87881200  |
| H  | 6.14073300  | -0.67487000 | 2.50218100  |
| H  | 6.11082200  | -2.43923300 | 2.49794300  |
| H  | 6.66919000  | -1.57661000 | 1.06362800  |
| C  | 4.30331900  | -2.87993600 | 0.54819600  |
| H  | 4.52175200  | -3.74805900 | 1.18141800  |
| H  | 3.27921300  | -2.96886500 | 0.17681800  |
| H  | 4.98799300  | -2.90489000 | -0.30742600 |
| C  | 3.65885000  | 1.85809300  | -1.23039300 |
| H  | 3.44595600  | 2.68983600  | -1.89358100 |
| C  | -2.38933300 | 1.07315500  | -0.88650200 |
| C  | -4.61548400 | 1.93442900  | -0.42164400 |
| C  | -3.34755700 | 2.07982300  | -0.99465300 |
| C  | -1.08095100 | 1.17707000  | -1.61771100 |
| H  | -1.01536800 | 2.15800600  | -2.11234200 |
| H  | -1.03786700 | 0.41551000  | -2.40606500 |
| H  | 1.29011900  | 1.99985200  | -2.24278500 |
| H  | 1.19957900  | 0.24059100  | -2.40712100 |
| H  | -3.09496000 | 2.97562700  | -1.55203500 |
| C  | -5.70156100 | 3.01921900  | -0.50627800 |
| C  | -6.11327500 | 3.44474900  | 0.92442300  |
| C  | -5.21839700 | 4.27289900  | -1.26075700 |
| C  | -6.93703700 | 2.45420700  | -1.24969500 |
| H  | -6.51308200 | 2.60637600  | 1.50407600  |
| H  | -5.25971700 | 3.85821900  | 1.47420400  |
| H  | -6.89086900 | 4.21563300  | 0.87753300  |
| H  | -4.94870700 | 4.04896300  | -2.29926200 |
| H  | -6.02081500 | 5.01746200  | -1.28592400 |
| H  | -4.35496200 | 4.73954400  | -0.77177000 |
| H  | -7.71891700 | 3.21954900  | -1.31369000 |
| H  | -6.67788300 | 2.14855200  | -2.26958200 |
| H  | -7.36485300 | 1.58646100  | -0.73688900 |
| H  | 7.64080400  | 1.15955000  | -0.94448400 |
| H  | 8.08229300  | 2.66774100  | -1.75421400 |
| O  | 0.30620400  | -2.11120000 | -1.74740500 |
| O  | 0.05761200  | -2.60414500 | 1.02885200  |
| Br | -1.13428200 | -2.58665600 | -2.86686700 |
| H  | 0.76373300  | -3.01052400 | -1.55401800 |
| O  | 1.24088100  | -4.38371400 | -0.95883300 |
| H  | 0.94636500  | -4.30013700 | -0.03180300 |
| H  | 2.20507100  | -4.49417900 | -0.91902200 |

*Ts4*

|   |             |             |             |
|---|-------------|-------------|-------------|
| V | 0.00904700  | 0.95209100  | 0.74022400  |
| O | 1.74944800  | 0.90243000  | 0.26257900  |
| O | -1.77063600 | 0.70701100  | 0.62292600  |
| N | -0.08068800 | -0.98935400 | -0.75903800 |
| N | 0.35662500  | -0.70859100 | 1.98627900  |
| C | 0.67087500  | -0.50597300 | 3.28688500  |
| H | 0.63168900  | 0.52281000  | 3.62101800  |
| C | 1.02354900  | -1.54125300 | 4.13838200  |
| H | 1.26278000  | -1.32450800 | 5.17358100  |
| C | 1.06885200  | -2.84104000 | 3.63136000  |
| H | 1.35145100  | -3.67589900 | 4.26542700  |
| C | 0.74186600  | -3.04840400 | 2.29647100  |
| H | 0.75627700  | -4.04492000 | 1.86641100  |
| C | 0.37700100  | -1.96572000 | 1.49199000  |
| C | -0.10501100 | -2.20144800 | 0.08140500  |
| H | -1.13992800 | -2.55560200 | 0.15301200  |
| H | 0.47560900  | -3.01462300 | -0.37331100 |
| C | 5.01616600  | -0.67052200 | -0.03777400 |
| H | 6.03085000  | -0.56438600 | 0.32181800  |
| C | 4.07691100  | 0.28299000  | 0.35970700  |
| C | 2.74875100  | 0.09481400  | -0.12589600 |
| C | 4.47864800  | 1.48179400  | 1.24360000  |
| C | 4.20971000  | 2.79837600  | 0.47306400  |
| H | 4.80985500  | 2.83953400  | -0.44381500 |
| H | 3.15470500  | 2.89153400  | 0.20411400  |
| H | 4.48610700  | 3.65737200  | 1.09611300  |
| C | 3.68264000  | 1.48417900  | 2.57071400  |
| H | 2.61682300  | 1.65339900  | 2.40805900  |
| H | 3.81193000  | 0.53517900  | 3.10470100  |
| H | 4.05430200  | 2.28478400  | 3.22120400  |
| C | 5.97843400  | 1.45840200  | 1.60610700  |
| H | 6.24779300  | 0.57419700  | 2.19476600  |
| H | 6.62110400  | 1.49470300  | 0.71973000  |
| H | 6.21217900  | 2.33822700  | 2.21453000  |
| C | -1.30059500 | -0.89910700 | -1.62163700 |
| C | -2.60832800 | -0.91193200 | -0.87840000 |
| C | -2.80217800 | -0.05111500 | 0.22140400  |
| C | -4.06004800 | 0.02377200  | 0.88823700  |
| C | -5.06789000 | -0.80579700 | 0.39279100  |
| H | -6.03598800 | -0.77439600 | 0.87413400  |
| C | -4.90953600 | -1.68668600 | -0.69439400 |
| C | -6.09325200 | -2.55158600 | -1.15689700 |
| C | -7.26095000 | -1.62962400 | -1.58769000 |
| H | -6.96326100 | -0.97598200 | -2.41529700 |
| C | -5.72632000 | -3.45511500 | -2.34975000 |
| H | -6.59814300 | -4.05031900 | -2.64032700 |
| H | -5.42067400 | -2.87388500 | -3.22731300 |
| H | -4.92073600 | -4.15579600 | -2.10054300 |
| C | -6.55618700 | -3.45625200 | 0.01155400  |
| H | -6.88383400 | -2.87392000 | 0.87898900  |

|    |             |             |             |
|----|-------------|-------------|-------------|
| H  | -7.40075900 | -4.07760100 | -0.30715900 |
| H  | -5.74995800 | -4.12347200 | 0.33754000  |
| C  | -4.30439300 | 0.95233400  | 2.09626400  |
| C  | -3.37643500 | 0.54958900  | 3.26901900  |
| H  | -2.32150200 | 0.66437500  | 3.01083300  |
| H  | -3.58103800 | 1.18459400  | 4.13901100  |
| H  | -3.55398000 | -0.49079800 | 3.56581900  |
| C  | -5.75879800 | 0.86793100  | 2.60466700  |
| H  | -6.01769000 | -0.13827000 | 2.95213300  |
| H  | -5.87991900 | 1.54647600  | 3.45527900  |
| H  | -6.48347500 | 1.16875100  | 1.83991100  |
| C  | -4.04211000 | 2.42758400  | 1.70389600  |
| H  | -4.29161500 | 3.08727700  | 2.54248800  |
| H  | -2.98969900 | 2.58873300  | 1.45812600  |
| H  | -4.65852700 | 2.72345900  | 0.84724500  |
| C  | -3.65438700 | -1.72468700 | -1.31235500 |
| H  | -3.47906400 | -2.38059000 | -2.15817800 |
| C  | 2.44256300  | -0.95696800 | -1.01516600 |
| C  | 4.73459300  | -1.76361800 | -0.88072800 |
| C  | 3.42827400  | -1.87673200 | -1.36781000 |
| C  | 1.09534700  | -0.99130500 | -1.67992900 |
| H  | 1.03464500  | -1.87394400 | -2.33465300 |
| H  | 0.99039900  | -0.09898100 | -2.30369100 |
| H  | -1.29337800 | -1.72363500 | -2.35042700 |
| H  | -1.20349700 | 0.03059600  | -2.19069200 |
| H  | 3.16427500  | -2.67541600 | -2.05251100 |
| C  | 5.85018200  | -2.75625900 | -1.24640800 |
| C  | 6.40751900  | -3.40009000 | 0.04708200  |
| C  | 5.34939000  | -3.88379000 | -2.16943500 |
| C  | 6.98942600  | -2.00247200 | -1.97640400 |
| H  | 6.82788700  | -2.65414000 | 0.72941700  |
| H  | 5.62440200  | -3.94656700 | 0.58532500  |
| H  | 7.20542800  | -4.10916300 | -0.20095400 |
| H  | 4.97543200  | -3.49716400 | -3.12433200 |
| H  | 6.17498400  | -4.56667200 | -2.39510600 |
| H  | 4.55431000  | -4.47508100 | -1.70003300 |
| H  | 7.79185700  | -2.70070300 | -2.24016100 |
| H  | 6.62650100  | -1.53803500 | -2.90009100 |
| H  | 7.42673700  | -1.21583100 | -1.35308200 |
| H  | -7.60865200 | -0.99497800 | -0.76600600 |
| H  | -8.11159900 | -2.23403200 | -1.92244300 |
| O  | 0.37024200  | 1.99697200  | -2.07168800 |
| O  | 0.11314500  | 1.92199300  | 2.00905800  |
| Br | -0.90389700 | 2.56379700  | -3.31160600 |
| H  | 0.84891500  | 2.85282000  | -1.83851900 |
| O  | 1.52957000  | 4.30091900  | -1.40472100 |
| H  | 2.48610400  | 4.36125800  | -1.26439500 |
| H  | 1.10665200  | 4.57241500  | -0.56530700 |
| O  | -0.80895900 | 3.40977100  | -0.03612000 |
| O  | -0.19130300 | 4.35544000  | 0.87183500  |
| H  | -1.75711200 | 3.52060300  | 0.17062500  |
| H  | 0.08108000  | 3.73892100  | 1.59283200  |

|   |             |             |             |
|---|-------------|-------------|-------------|
| V | 0.03197900  | -1.43476700 | -0.55640000 |
| O | -1.74636100 | -1.13356200 | -0.77628600 |
| O | 1.81001900  | -1.14696400 | -0.60984800 |
| N | 0.06561300  | 1.01797000  | -0.64631400 |
| N | -0.12688600 | -0.83972800 | 1.44844800  |
| C | -0.27280000 | -1.78353500 | 2.40864900  |
| H | -0.22576200 | -2.80995700 | 2.06665400  |
| C | -0.47472000 | -1.46465000 | 3.74177100  |
| H | -0.58242500 | -2.25829400 | 4.47275500  |
| C | -0.54189600 | -0.11815900 | 4.10528400  |
| H | -0.70822200 | 0.17079300  | 5.13858800  |
| C | -0.39056900 | 0.84920400  | 3.11889700  |
| H | -0.43154200 | 1.90608300  | 3.36399500  |
| C | -0.17441200 | 0.46458800  | 1.79247900  |
| C | 0.08264300  | 1.52505300  | 0.74179800  |
| H | 1.06926200  | 1.95352200  | 0.95183500  |
| H | -0.64573200 | 2.33478800  | 0.87033100  |
| C | -4.98878600 | 0.32980600  | -0.02045500 |
| H | -5.98781400 | 0.03858000  | 0.27536100  |
| C | -4.04753100 | -0.67989300 | -0.23330200 |
| C | -2.74144900 | -0.24848300 | -0.60394700 |
| C | -4.41842600 | -2.17117500 | -0.10187500 |
| C | -4.18726100 | -2.88402300 | -1.45807700 |
| H | -4.79943200 | -2.43317500 | -2.24746400 |
| H | -3.13841100 | -2.83672600 | -1.76332800 |
| H | -4.46668600 | -3.94055800 | -1.37670700 |
| C | -3.56759400 | -2.85142800 | 0.99745000  |
| H | -2.50644800 | -2.85719200 | 0.74318700  |
| H | -3.69769100 | -2.34465700 | 1.96116800  |
| H | -3.88864200 | -3.89228700 | 1.12155300  |
| C | -5.90229700 | -2.36678600 | 0.27348300  |
| H | -6.14341100 | -1.92808800 | 1.24836700  |
| H | -6.57961600 | -1.94179100 | -0.47556100 |
| H | -6.11710300 | -3.43860200 | 0.33674400  |
| C | 1.26958200  | 1.46546500  | -1.41344900 |
| C | 2.58967700  | 1.07083900  | -0.81151900 |
| C | 2.82381700  | -0.27975100 | -0.48203700 |
| C | 4.10411700  | -0.71908300 | -0.03654500 |
| C | 5.07783900  | 0.27281200  | 0.10115700  |
| H | 6.05900600  | -0.02326900 | 0.44792200  |
| C | 4.87130200  | 1.63665400  | -0.18266400 |
| C | 6.01966800  | 2.64008600  | 0.01405300  |
| C | 7.21254400  | 2.23844600  | -0.88823900 |
| H | 6.92601400  | 2.24365300  | -1.94593900 |
| C | 5.60681800  | 4.08014400  | -0.34584800 |
| H | 6.45300400  | 4.75531800  | -0.18169900 |
| H | 5.31426200  | 4.17334400  | -1.39811000 |
| H | 4.77841400  | 4.43747100  | 0.27716400  |
| C | 6.46691800  | 2.62108300  | 1.49648500  |
| H | 6.81558600  | 1.63111700  | 1.80798300  |

|   |             |             |             |
|---|-------------|-------------|-------------|
| H | 7.29213100  | 3.32593200  | 1.64877400  |
| H | 5.64538400  | 2.91341000  | 2.16069700  |
| C | 4.40927900  | -2.20022000 | 0.26450400  |
| C | 3.50644400  | -2.71520300 | 1.41248700  |
| H | 2.45207700  | -2.71495400 | 1.13101000  |
| H | 3.78460200  | -3.74496700 | 1.66507700  |
| H | 3.63257000  | -2.10387400 | 2.31421000  |
| C | 5.87462100  | -2.40912700 | 0.69957400  |
| H | 6.11258300  | -1.87714400 | 1.62781400  |
| H | 6.04306800  | -3.47517100 | 0.88331500  |
| H | 6.58515300  | -2.09531900 | -0.07324100 |
| C | 4.17593800  | -3.05094000 | -1.00951500 |
| H | 4.41381000  | -4.10057500 | -0.80196600 |
| H | 3.13852600  | -3.00133300 | -1.34802500 |
| H | 4.82684500  | -2.71559700 | -1.82552700 |
| C | 3.60525000  | 2.01172200  | -0.64733500 |
| H | 3.39812400  | 3.04496300  | -0.90502000 |
| C | -2.45905200 | 1.11556600  | -0.81292500 |
| C | -4.72990300 | 1.70616600  | -0.17149000 |
| C | -3.44514600 | 2.07474400  | -0.58366700 |
| C | -1.13051200 | 1.50410700  | -1.39740200 |
| H | -1.07983400 | 2.59971400  | -1.49124800 |
| H | -1.03940500 | 1.08790000  | -2.40769300 |
| H | 1.24026600  | 2.55815000  | -1.54215500 |
| H | 1.16563300  | 1.02074200  | -2.41013400 |
| H | -3.19992200 | 3.11782200  | -0.75385500 |
| C | -5.84803800 | 2.72765000  | 0.09568500  |
| C | -6.32535200 | 2.59208100  | 1.56245700  |
| C | -5.37901600 | 4.17861100  | -0.12540800 |
| C | -7.03578300 | 2.45332200  | -0.85923500 |
| H | -6.71328000 | 1.59119400  | 1.77829000  |
| H | -5.50712800 | 2.79449000  | 2.26337800  |
| H | -7.12878400 | 3.30952700  | 1.76451100  |
| H | -5.06179200 | 4.35444600  | -1.15974200 |
| H | -6.20499500 | 4.86640800  | 0.08336800  |
| H | -4.55183200 | 4.44888400  | 0.54159000  |
| H | -7.83969500 | 3.17519300  | -0.67548500 |
| H | -6.72919800 | 2.54724100  | -1.90710900 |
| H | -7.45315800 | 1.45075200  | -0.71973400 |
| H | 7.59307300  | 1.24048500  | -0.64741700 |
| H | 8.03769600  | 2.94774500  | -0.75727900 |
| O | -0.00093600 | -2.98096200 | -0.20433200 |
| O | 0.09239800  | -2.03536300 | -2.71655800 |
| O | 0.03296500  | -0.92684700 | -3.65043500 |
| H | -0.75288500 | -2.49486000 | -2.89857700 |
| H | 0.77698900  | -1.16391000 | -4.23836800 |

|   |             |             |             |
|---|-------------|-------------|-------------|
| V | 0.05302800  | -1.36126000 | -0.36246100 |
| O | -1.71827700 | -1.06472700 | -0.61029900 |
| O | 1.84209200  | -1.10973500 | -0.32896400 |
| N | 0.13459900  | 1.04539400  | -0.69626200 |
| N | -0.17074900 | -0.56588900 | 1.57523300  |
| C | -0.40526700 | -1.39466000 | 2.61805100  |
| H | -0.36954500 | -2.45320700 | 2.39238700  |
| C | -0.67900000 | -0.92690200 | 3.89415400  |
| H | -0.85568000 | -1.63242000 | 4.69846100  |
| C | -0.72847100 | 0.45229400  | 4.10471300  |
| H | -0.95190200 | 0.85624800  | 5.08746200  |
| C | -0.48366700 | 1.30283600  | 3.03258700  |
| H | -0.50561300 | 2.38070500  | 3.15960900  |
| C | -0.19445500 | 0.76875000  | 1.77405800  |
| C | 0.19614000  | 1.68559400  | 0.63535700  |
| H | 1.22771400  | 2.00539000  | 0.82119400  |
| H | -0.42549300 | 2.58917400  | 0.66730000  |
| C | -4.93384200 | 0.51117100  | 0.00675700  |
| H | -5.93902100 | 0.26250400  | 0.32060100  |
| C | -4.01323400 | -0.52983700 | -0.12860900 |
| C | -2.69569400 | -0.15344100 | -0.52283300 |
| C | -4.41762800 | -1.99997000 | 0.10058500  |
| C | -4.20397200 | -2.80162600 | -1.20824400 |
| H | -4.81209400 | -2.38855400 | -2.02109300 |
| H | -3.15945800 | -2.79651400 | -1.52819300 |
| H | -4.50933400 | -3.84419800 | -1.05974800 |
| C | -3.58292800 | -2.62779000 | 1.24244200  |
| H | -2.52311600 | -2.68129800 | 0.98742900  |
| H | -3.69261600 | -2.05254500 | 2.16967900  |
| H | -3.93515900 | -3.64741800 | 1.43912500  |
| C | -5.90468700 | -2.13608800 | 0.48905200  |
| H | -6.13589200 | -1.62811600 | 1.43244300  |
| H | -6.57297600 | -1.74795800 | -0.28747900 |
| H | -6.14271800 | -3.19643400 | 0.62277600  |
| C | 1.33685700  | 1.36497500  | -1.52766700 |
| C | 2.65618900  | 1.03595000  | -0.88527800 |
| C | 2.86387000  | -0.24683000 | -0.33698700 |
| C | 4.13706900  | -0.62645400 | 0.18047000  |
| C | 5.13200300  | 0.35254100  | 0.14754000  |
| H | 6.10759100  | 0.09873800  | 0.54025800  |
| C | 4.95319400  | 1.65227900  | -0.36427800 |
| C | 6.12204200  | 2.65109300  | -0.34325800 |
| C | 7.30104100  | 2.08003400  | -1.16902400 |
| H | 7.00998100  | 1.91962700  | -2.21328800 |
| C | 5.73402500  | 4.01745800  | -0.94009200 |
| H | 6.59495600  | 4.69283700  | -0.90060700 |
| H | 5.43143000  | 3.93585900  | -1.99050000 |
| H | 4.91978100  | 4.49338100  | -0.38100600 |
| C | 6.57990100  | 2.87456400  | 1.11912700  |
| H | 6.91757700  | 1.94627500  | 1.59150700  |



|   |             |             |             |
|---|-------------|-------------|-------------|
| H | 7.41555400  | 3.58308100  | 1.14696800  |
| H | 5.76707500  | 3.28623900  | 1.72855200  |
| C | 4.40874900  | -2.03862100 | 0.73715100  |
| C | 3.49939100  | -2.31757700 | 1.95926400  |
| H | 2.44208900  | -2.31070700 | 1.68793300  |
| H | 3.73431000  | -3.30401300 | 2.37612400  |
| H | 3.66510800  | -1.57346100 | 2.74754200  |
| C | 5.87057000  | -2.20507800 | 1.20134700  |
| H | 6.12737200  | -1.52077700 | 2.01790500  |
| H | 6.01307600  | -3.22472700 | 1.57409300  |
| H | 6.58416400  | -2.05368400 | 0.38377900  |
| C | 4.14837400  | -3.09646100 | -0.36494900 |
| H | 4.36796900  | -4.09740500 | 0.02494700  |
| H | 3.10997900  | -3.08246500 | -0.70312700 |
| H | 4.79860800  | -2.92442900 | -1.23059200 |
| C | 3.69230600  | 1.96941400  | -0.88158500 |
| H | 3.50321000  | 2.95032700  | -1.30447800 |
| C | -2.38853400 | 1.18621000  | -0.83708800 |
| C | -4.64695800 | 1.86755100  | -0.24421600 |
| C | -3.35583100 | 2.17832800  | -0.68303100 |
| C | -1.06082800 | 1.50137900  | -1.46515400 |
| H | -0.98582100 | 2.58594500  | -1.63794800 |
| H | -0.99863200 | 1.00528600  | -2.43977400 |
| H | 1.32382500  | 2.43039700  | -1.80311700 |
| H | 1.21204400  | 0.79403800  | -2.45607500 |
| H | -3.09081700 | 3.20012200  | -0.93385400 |
| C | -5.74358500 | 2.92825000  | -0.05365100 |
| C | -6.22641800 | 2.90622300  | 1.41740100  |
| C | -5.24377100 | 4.35016200  | -0.37411000 |
| C | -6.93487000 | 2.61203900  | -0.99109400 |
| H | -6.63374700 | 1.93058300  | 1.70189900  |
| H | -5.40582000 | 3.14198700  | 2.10509300  |
| H | -7.01640900 | 3.65124800  | 1.56564800  |
| H | -4.92434900 | 4.44784700  | -1.41804200 |
| H | -6.05437100 | 5.06837200  | -0.21270100 |
| H | -4.40971300 | 4.64742200  | 0.27256200  |
| H | -7.72269100 | 3.36336000  | -0.86415000 |
| H | -6.62294000 | 2.62197300  | -2.04151000 |
| H | -7.37501100 | 1.63185400  | -0.78076700 |
| H | 7.65970300  | 1.12574500  | -0.76947900 |
| H | 8.14281400  | 2.78176800  | -1.15597400 |
| O | -0.00734900 | -2.88486600 | 0.11509000  |
| O | 0.26643700  | -1.96980400 | -2.44515800 |
| O | -0.53869300 | -1.20767900 | -3.37990000 |
| H | -0.14648900 | -2.90375200 | -2.48404400 |
| H | 0.06747000  | -1.18469900 | -4.14532300 |
| O | -0.72477300 | -4.35252900 | -2.19121100 |
| H | -0.12543300 | -5.08462000 | -2.41070800 |
| H | -0.75111300 | -4.31432300 | -1.21579500 |

**Ts5**

|   |             |             |             |
|---|-------------|-------------|-------------|
| V | -0.03590500 | -1.35831500 | -0.49456800 |
| O | -1.81119700 | -1.11115500 | -0.41613100 |
| O | 1.78382600  | -1.12154200 | -0.62145900 |
| N | -0.06382800 | 1.01869000  | -0.74076500 |
| N | 0.12659800  | -0.57546200 | 1.50984600  |
| C | 0.25799200  | -1.43106900 | 2.54763500  |
| H | 0.21461000  | -2.48341800 | 2.29457000  |
| C | 0.43719900  | -0.99614100 | 3.85249500  |
| H | 0.53409400  | -1.72082900 | 4.65347600  |
| C | 0.49197100  | 0.37750900  | 4.09813100  |
| H | 0.63803500  | 0.75571400  | 5.10544300  |
| C | 0.35330700  | 1.25596200  | 3.02951300  |
| H | 0.38498700  | 2.33047400  | 3.18236600  |
| C | 0.16298100  | 0.74957600  | 1.74034200  |
| C | -0.06854100 | 1.69307800  | 0.57979300  |
| H | 0.68559900  | 2.48794600  | 0.60807200  |
| H | -1.04133400 | 2.17381300  | 0.73138500  |
| C | -5.05820200 | 0.39160600  | 0.18014100  |
| H | -6.03366700 | 0.14338700  | 0.57667100  |
| C | -4.08950900 | -0.61274700 | 0.14785300  |
| C | -2.81599300 | -0.23520900 | -0.37147000 |
| C | -4.39070200 | -2.04952600 | 0.61661100  |
| C | -4.20500700 | -3.02731000 | -0.57173400 |
| H | -4.89849600 | -2.78539800 | -1.38537600 |
| H | -3.18802900 | -3.00082500 | -0.96889500 |
| H | -4.41819500 | -4.05124900 | -0.24302000 |
| C | -3.45009600 | -2.45078800 | 1.77944400  |
| H | -2.40636200 | -2.48698600 | 1.46286100  |
| H | -3.54128800 | -1.74997200 | 2.61817500  |
| H | -3.72455000 | -3.44697300 | 2.14542300  |
| C | -5.84056300 | -2.19827900 | 1.12157200  |
| H | -6.04415200 | -1.56356300 | 1.99168700  |
| H | -6.57603500 | -1.96741500 | 0.34296600  |
| H | -6.00670500 | -3.23611400 | 1.42812700  |
| C | 1.12674300  | 1.41754100  | -1.55182700 |
| C | 2.45240900  | 1.12545900  | -0.90831000 |
| C | 2.75025200  | -0.19953700 | -0.53065800 |
| C | 4.05928100  | -0.54947200 | -0.08440600 |
| C | 4.97607600  | 0.49728600  | 0.02908800  |
| H | 5.97261900  | 0.26478900  | 0.38108200  |
| C | 4.69521200  | 1.84042400  | -0.28928400 |
| C | 5.78428700  | 2.91220800  | -0.11710300 |
| C | 6.99949300  | 2.56038000  | -1.00998300 |
| H | 6.71420700  | 2.52512500  | -2.06741600 |
| C | 5.28823600  | 4.31698200  | -0.51069600 |
| H | 6.09273100  | 5.04468100  | -0.36199000 |
| H | 4.99272600  | 4.36830000  | -1.56498300 |
| H | 4.43847100  | 4.63885000  | 0.10292300  |
| C | 6.23098500  | 2.95509900  | 1.36485700  |
| H | 6.63891100  | 1.99547800  | 1.69916900  |

|   |             |             |             |
|---|-------------|-------------|-------------|
| H | 7.01171200  | 3.71205100  | 1.50116600  |
| H | 5.39231700  | 3.21184800  | 2.02243300  |
| C | 4.46096500  | -2.00717900 | 0.22150400  |
| C | 3.58017200  | -2.60088600 | 1.34671500  |
| H | 2.53163200  | -2.66921900 | 1.05197000  |
| H | 3.93029000  | -3.60890800 | 1.59980400  |
| H | 3.64559000  | -1.98882700 | 2.25364500  |
| C | 5.93055000  | -2.12596900 | 0.67619500  |
| H | 6.11614900  | -1.58260600 | 1.60931200  |
| H | 6.16560700  | -3.17967400 | 0.85981400  |
| H | 6.63184500  | -1.76216900 | -0.08252500 |
| C | 4.31252400  | -2.85459500 | -1.06767100 |
| H | 4.54943700  | -3.90539400 | -0.86068100 |
| H | 3.29260700  | -2.78626900 | -1.46036300 |
| H | 4.99245600  | -2.50349700 | -1.85147600 |
| C | 3.41510600  | 2.12591900  | -0.77348200 |
| H | 3.15364600  | 3.13525500  | -1.07382800 |
| C | -2.58648500 | 1.06464900  | -0.87017200 |
| C | -4.85550000 | 1.70949900  | -0.27529300 |
| C | -3.59770500 | 2.02073100  | -0.80668000 |
| C | -1.27866600 | 1.36704100  | -1.54504400 |
| H | -1.24372000 | 2.43237900  | -1.81656200 |
| H | -1.20107800 | 0.78695100  | -2.47132900 |
| H | 1.06133400  | 2.49094000  | -1.78410300 |
| H | 1.04213600  | 0.86942100  | -2.49681000 |
| H | -3.39605700 | 3.01247900  | -1.19716000 |
| C | -6.00037400 | 2.73168300  | -0.19088800 |
| C | -6.43295300 | 2.89781200  | 1.28678800  |
| C | -5.59089700 | 4.11539000  | -0.73092500 |
| C | -7.20294900 | 2.22376300  | -1.02447800 |
| H | -6.78275700 | 1.95626900  | 1.72246400  |
| H | -5.60388700 | 3.26646400  | 1.90180400  |
| H | -7.25389200 | 3.62035500  | 1.35751300  |
| H | -5.31047800 | 4.07721300  | -1.78991500 |
| H | -6.43464000 | 4.80756700  | -0.64259300 |
| H | -4.75525300 | 4.54552800  | -0.16629100 |
| H | -8.02702400 | 2.94437900  | -0.97121100 |
| H | -6.92795100 | 2.10055400  | -2.07803200 |
| H | -7.58012600 | 1.26247300  | -0.66055200 |
| H | 7.43553800  | 1.59119600  | -0.74654500 |
| H | 7.78301700  | 3.31812100  | -0.89529500 |
| O | 0.01932200  | -2.94631000 | -0.03080900 |
| O | 0.03741400  | -1.60086800 | -2.40600300 |
| O | -1.25596400 | -1.82773000 | -3.04099300 |
| H | 0.62113300  | -3.08665600 | -2.46112200 |
| H | -1.05081800 | -1.52684300 | -3.94597200 |
| O | 0.85437400  | -4.00476600 | -2.04282300 |
| H | 1.82928500  | -4.07676600 | -2.02039900 |
| H | 0.50841000  | -3.72816900 | -1.01409400 |

*Ald*

|   |             |             |             |
|---|-------------|-------------|-------------|
| C | -2.05350100 | -1.02040700 | 0.00005800  |
| C | -2.30309800 | 0.36377000  | 0.00005600  |
| C | -0.74217000 | -1.46634700 | -0.00028300 |
| C | -1.26578100 | 1.28710400  | -0.00038200 |
| H | -3.32939100 | 0.72183000  | 0.00111200  |
| C | 0.33233200  | -0.55462700 | -0.00019400 |
| H | -0.52115300 | -2.53179200 | 0.00018900  |
| C | 0.06582200  | 0.84209700  | -0.00036400 |
| H | -1.45411900 | 2.35579100  | 0.00039100  |
| H | -2.87821700 | -1.72603900 | 0.00120400  |
| O | 1.05138400  | 1.75101000  | 0.00032900  |
| H | 1.90856000  | 1.25227600  | -0.00046700 |
| C | 1.70411000  | -1.03453700 | 0.00002600  |
| O | 2.70033500  | -0.30597400 | 0.00013200  |
| H | 1.83428600  | -2.13467100 | 0.00038200  |

*Ald\_(H<sub>2</sub>O<sub>3</sub>Br)<sup>+</sup>*

|    |             |             |             |
|----|-------------|-------------|-------------|
| O  | 3.47623300  | -1.08593700 | -0.77190100 |
| H  | 3.97385200  | -1.65718100 | -0.16309800 |
| Br | 1.45095500  | -0.46848500 | 0.39131400  |
| H  | 4.02639400  | -0.26387400 | -0.88879600 |
| O  | 4.94644400  | 1.15449600  | -1.18621800 |
| H  | 5.04370200  | 1.33604600  | -2.13471300 |
| H  | 5.84282500  | 1.22730000  | -0.82203800 |
| C  | -0.29461800 | 0.06349600  | 1.49957000  |
| C  | -0.49586400 | 1.48483400  | 1.21355700  |
| C  | -1.26938000 | -0.85866600 | 0.93740800  |
| C  | -1.48061900 | 1.92164300  | 0.38140200  |
| H  | 0.18696400  | 2.19334000  | 1.67242800  |
| C  | -2.25814100 | -0.43562300 | 0.08744700  |
| H  | -1.18280800 | -1.91327300 | 1.18821200  |
| C  | -2.37617900 | 0.97752100  | -0.20494900 |
| H  | -1.61973500 | 2.97077000  | 0.14403400  |
| H  | 0.04921300  | -0.17159800 | 2.50577000  |
| O  | -3.30047200 | 1.42133800  | -1.00289400 |
| H  | -3.85324700 | 0.64154600  | -1.32835300 |
| C  | -3.21049400 | -1.38010100 | -0.52537200 |
| O  | -4.10323100 | -1.00947600 | -1.27974800 |
| H  | -3.09063000 | -2.44808900 | -0.27773400 |

*Ald\_(H<sub>2</sub>O<sub>3</sub>Br)<sup>+</sup>\_1*

|    |             |             |             |
|----|-------------|-------------|-------------|
| O  | -2.05659300 | 1.23263300  | 2.23842500  |
| H  | -2.87168500 | 0.96595200  | 2.69151300  |
| Br | -1.92831800 | -0.98794400 | -0.85306500 |
| H  | -2.32445100 | 1.86238400  | 1.53323600  |
| O  | -2.28880900 | 2.72163200  | -0.10231100 |

|   |             |             |             |
|---|-------------|-------------|-------------|
| H | -2.33157300 | 3.69072800  | -0.05153600 |
| H | -3.00701700 | 2.46934500  | -0.70521300 |
| C | -0.53061200 | -0.42958900 | 0.46030800  |
| C | 0.17107200  | -1.62051000 | 0.97454500  |
| C | 0.31101700  | 0.60254600  | -0.16155500 |
| C | 1.52499800  | -1.72070600 | 0.96899900  |
| H | -0.43751900 | -2.41682000 | 1.39221100  |
| C | 1.67147700  | 0.50829000  | -0.17683500 |
| H | -0.19868500 | 1.47721400  | -0.56265300 |
| C | 2.30543000  | -0.66947000 | 0.39382300  |
| H | 2.04950600  | -2.57955700 | 1.37424700  |
| H | -1.15316100 | 0.06988700  | 1.26343000  |
| O | 3.59324500  | -0.79577400 | 0.39142600  |
| H | 4.00556800  | 0.01856700  | -0.04658200 |
| C | 2.51936200  | 1.56706600  | -0.76295900 |
| O | 3.74185300  | 1.48529800  | -0.77998100 |
| H | 2.00611700  | 2.44426900  | -1.18981500 |

*Ald\_(H<sub>2</sub>O<sub>3</sub>Br)<sup>+</sup>\_2*

|    |             |             |             |
|----|-------------|-------------|-------------|
| O  | -0.24474700 | 2.66913700  | -0.72480900 |
| H  | 0.00142900  | 3.61063600  | -0.75312600 |
| Br | -2.36212100 | -1.02325600 | 0.12926700  |
| H  | -1.47624700 | 2.33785600  | -0.91188900 |
| O  | -2.52422500 | 1.94689400  | -1.15459000 |
| H  | -3.24985600 | 2.48598400  | -0.78539900 |
| H  | -2.63767000 | 0.99917900  | -0.84947200 |
| C  | -0.52057000 | -0.52814500 | 0.39794400  |
| C  | -0.19405100 | 0.34434900  | 1.44618600  |
| C  | 0.45614000  | -1.01449700 | -0.45743100 |
| C  | 1.12170400  | 0.77680800  | 1.60466900  |
| H  | -0.95899000 | 0.67555600  | 2.14193700  |
| C  | 1.79018100  | -0.61085400 | -0.29409500 |
| H  | 0.20079000  | -1.70352600 | -1.25742300 |
| C  | 2.13527300  | 0.30249400  | 0.74113300  |
| H  | 1.40350700  | 1.42538600  | 2.42868300  |
| H  | 0.19828200  | 2.23971100  | 0.04237500  |
| O  | 3.37664000  | 0.73107300  | 0.93370000  |
| H  | 3.96277300  | 0.29253000  | 0.25985000  |
| C  | 2.83597900  | -1.12619400 | -1.18966400 |
| O  | 4.01311500  | -0.79342500 | -1.09988000 |
| H  | 2.51599900  | -1.84254900 | -1.96772400 |

*Ald\_Br*

|    |             |             |             |
|----|-------------|-------------|-------------|
| Br | -2.69387600 | -0.26737300 | 0.00003700  |
| C  | -0.83595500 | 0.17350200  | -0.00006400 |
| C  | -0.44395900 | 1.52203700  | 0.00000800  |
| C  | 0.11650800  | -0.82848200 | -0.00013000 |
| C  | 0.90053100  | 1.86472800  | 0.00001500  |

|   |             |             |             |
|---|-------------|-------------|-------------|
| H | -1.20059800 | 2.29937900  | 0.00020900  |
| C | 1.48600500  | -0.49934000 | -0.00022300 |
| H | -0.18115400 | -1.87291700 | -0.00023100 |
| C | 1.88618700  | 0.86382500  | -0.00015700 |
| H | 1.21370800  | 2.90352600  | 0.00024700  |
| O | 3.17491200  | 1.22658900  | -0.00001000 |
| H | 3.71415400  | 0.39401500  | 0.00026700  |
| C | 2.48903700  | -1.55492600 | -0.00000100 |
| O | 3.70555600  | -1.35414900 | 0.00021800  |
| H | 2.10568200  | -2.59351800 | -0.00014500 |
